1 **Predicting the conservation status of Europe's Data Deficient sharks and rays**

2

3 Predicting status of Data Deficient sharks

4

5

6 Rachel H.L. Walls<sup>1\*</sup>, Nicholas K. Dulvy<sup>1</sup>

7

8 <sup>1</sup>Earth to Ocean Research Group, Department of Biological Sciences, Simon Fraser University,

9 Burnaby, BC, Canada

10

11 \*Corresponding author.

12 *Contact:* +1(778)251-8227, [rwalls@sfu.ca](mailto:rwalls@sfu.ca) (Rachel HL Walls)

13

14

15 **Keywords:** Aichi target, Chondrichthyes, Elasmobranchii, depth refuge, General Fisheries

16 Commission for the Mediterranean, Red List Index

17 **ABSTRACT**

18 Shark and ray biodiversity is threatened primarily by overfishing and the globalisation of trade,  
19 and Europe has been one of the most documented heavily fished regions for a relatively long  
20 time. Yet, we have little idea of the conservation status of the hundreds of Data Deficient shark  
21 and ray species. It is important to derive some insight into the status of these species, both to  
22 understand global extinction rates and also to ensure that any threatened Data Deficient species  
23 are not overlooked in conservation planning. Here, we developed a biological and ecological trait  
24 model to predict the categorical conservation status of 26 Northeast Atlantic and 15  
25 Mediterranean Sea Data Deficient sharks and rays. We first developed an explanatory model  
26 based on all species *evaluated* on the International Union for Conservation of Nature (IUCN)  
27 Red List of Threatened Species<sup>TM</sup>, using maximum body size, median depth (as a proxy for  
28 fisheries exposure), and reproductive mode, and then *predicted* the status of all Data Deficient  
29 species. Almost half of Northeast Atlantic (46%,  $n=12$  of 26), and two-thirds of Mediterranean  
30 (67%,  $n=10$  of 15) Data Deficient species are predicted to be in one of the three IUCN threatened  
31 categories. Northeast Atlantic Data Deficient species are *predicted* to be 1.2 times more  
32 threatened than *evaluated* species (38%,  $n=36$  of 94), whereas threat levels in the Mediterranean  
33 Sea are relative for each (66%,  $n=38$  of 58). This case study is intended for extrapolation to the  
34 global shark and ray dataset upon completion of the global IUCN Red List assessment. Trait-  
35 based, categorical prediction of conservation status is a cost-effective approach towards  
36 incorporating Data Deficient species into (i) estimates of lineage-wide extinction rates, (ii)  
37 revised protected species lists, and (iii) Red List Indices, thus preventing poorly known species  
38 from reaching extinction unnoticed.

## 39 **1 INTRODUCTION**

40 Despite a broadening of coverage of species and more intensive Red List assessment by the  
41 International Union for Conservation of Nature (IUCN) in the past decade, over one-sixth or  
42 around 13,465 species have been found to be Data Deficient (Bland et al., 2017). Data-deficiency  
43 is most prevalent in reptiles and amphibians, marine and freshwater organisms, invertebrates,  
44 and plants (Bland et al., 2012, 2014; Böhm et al., 2013; Callmander et al., 2005; Collen et al.,  
45 2012; Hoffmann et al., 2010). The IUCN classification means that there are insufficient data to  
46 make a more refined determination, hence Data Deficient species could range from actually  
47 being Least Concern or they could be threatened or even Extinct. Data-deficiency creates  
48 uncertainty in estimates of extinction rates, which is a key challenge to track progress towards  
49 the Convention on Biological Diversity's (CBD) Aichi Target 12: to halt the loss of biodiversity  
50 by 2020 (CBD & UNEP, 2011). Clearly, a complete understanding of which species are  
51 threatened (Vulnerable, Endangered, or Critically Endangered) is an essential first step toward  
52 tracking and improving species' status (Bland et al., 2014, 2015).

53  
54 Data Deficient species are typically overlooked in conservation planning (Bland et al., 2014),  
55 with the implicit assumption that the biology and threatening processes of both Data Deficient  
56 and data-sufficient species are similar. To provide a first-approximation of the extinction rate of  
57 any taxon, the IUCN assumes Data Deficient species are equally as threatened as the data-  
58 sufficient species within a taxonomic group (Hoffmann et al., 2010). However, there are  
59 numerous reasons why the trait distribution and exposure to threatening processes might be  
60 different. For example, most recently discovered sharks have been found in the deep sea  
61 (Randhawa et al., 2015) and are relatively small-bodied, beyond the reach of most fisheries,

62 hence those Data Deficient deepwater species may actually be Least Concern because they have  
63 refuge from the main threatening process of overfishing. Conversely, many recently resolved  
64 species complexes, such as devil rays, eagle rays, and skates may be highly exposed to fisheries  
65 and hence the newly described ‘Data Deficient’ species might already be highly threatened  
66 (Iglésias et al., 2010; White & Last, 2012).

67  
68 There is a vast body of work on the correlates of population trajectories and extinction risk  
69 (Cardillo et al., 2005; McKinney, 1997; Owens & Bennett, 2000). Broadly, large body size,  
70 small geographic range, and ecological specialisation are the biological traits most often related  
71 to extinction risk, depending on their interaction with the appropriate threatening process (Owens  
72 & Bennett, 2000; Reynolds et al., 2005b). Only recently has this knowledge been used to predict  
73 extinction risk of Data Deficient species (Bland et al., 2015; Butchart & Bird, 2010; Dulvy et al.,  
74 2014; Jetz & Freckleton, 2015). Trait-based predictions of IUCN conservation status use  
75 biological and ecological trait data to predict the most likely categorisations for Data Deficient  
76 species based on assessed species. The simplest approach is to make the binary prediction  
77 whether a Data Deficient species is Least Concern or threatened. This approach has been used  
78 with a high degree of accuracy for mammals, birds, sharks and rays (Bland et al., 2015; Butchart  
79 & Bird, 2010; Dulvy et al., 2014; Jetz & Freckleton, 2015). The most significant advance has  
80 been the development of ordinal (or categorical) regression which enables prediction of the  
81 actual IUCN Red List category, based on relevant biological and ecological traits (Luiz et al.,  
82 2016). A total of 50 of 163 groupers (family Epinephelinae) were Data Deficient, yet trait-based  
83 ordinal regression revealed a total of three species predicted to be Critically Endangered, five to  
84 be Endangered, and 12 to be Vulnerable (Luiz et al., 2016).

85  
86 Sharks and rays represent the oldest evolutionary radiation of vertebrate Classes (Stein et al.,  
87 2018), with an incredibly broad range of life-histories, spanning all ocean basins, and down to  
88 great depths (Cortés, 2000; Dulvy et al., 2014; Dulvy & Forrest, 2010). This makes them ideal  
89 for trait-based predictive modelling, while their high levels of population-relevant data-  
90 deficiency present the opportunity to test categorical predictions on a highly Data Deficient  
91 group for the first time. Europe represents the first region to be reassessed as part of an ongoing  
92 global IUCN Red List reassessment of sharks and rays, as well as being one of the most  
93 relatively data-sufficient regions for the Class (Dulvy et al., 2016; Fernandes et al., 2017; Nieto  
94 et al., 2015).

95  
96 Here, we use Europe's sharks and rays to consider three questions: (1) which biological and  
97 ecological traits are driving extinction risk; (2) how does the proportion of *evaluated*-threatened  
98 species compare with *predicted*-to-be-threatened Data Deficient species; and (3) which are the  
99 most threatened Data Deficient sharks and rays? We used cumulative link mixed-effects  
100 modeling (CLMM) to evaluate the relationship between species' trait data and conservation  
101 status, and eventually predict the conservation status of Europe's Data Deficient sharks and rays.  
102 This CLMM approach maintains the hierarchy of the IUCN categories while preventing the loss  
103 of information inevitable from lumping categories together as threatened and non-threatened  
104 (Luiz et al., 2016). Model performance was evaluated using the Akaike Information Criterion  
105 (AIC) with small sample size correction (AIC<sub>c</sub>).

106

107

## 108 **2 METHODS**

109 First, we describe the IUCN Red List conservation assessment of European sharks and rays.

110 Second, we describe the development of an explanatory trait-based model to explain

111 conservation status. Third, we describe the prediction and cross-validation of the conservation

112 status of Europe's Data Deficient sharks and rays.

113

### 114 **2.1 IUCN Red List assessment**

115 The European Red List assessments spanned the Northeast Atlantic Ocean and the

116 Mediterranean and Black Seas, including the territorial waters and Exclusive Economic Zones of

117 all European countries in the Northeast and Eastern Central Atlantic Ocean, and the offshore

118 Macronesian island territories belonging to Portugal and Spain (Dulvy et al., 2016; Fernandes et

119 al., 2017; Nieto et al., 2015).

120

121 In total, 131 species were assessed at the regional level for Europe using the 2001 IUCN Red

122 List Categories and Criteria, version 3.1 (IUCN, 2012b). We convened 54 experts, composed

123 mainly of members of the IUCN Shark Specialist Group, and completed the 131 European

124 assessments over 21 months, from 2013–15. This culminated in a one-week workshop, attended

125 by fifteen IUCN Shark Specialist Group members, to finalise and review all assessments. The

126 assessed species included 50 skates and rays (Order Rajiformes), 72 sharks (Order

127 Carcharhiniformes, Hexanchiformes, Lamniformes, Squaliformes, Squatiniformes), and nine

128 chimaeras (Order Chimaeriformes). Only breeding residents of Europe were included in the

129 assessments, including 'visitor' species defined by the IUCN as "a taxon that does not reproduce

130 within a region but regularly occurs within its boundaries either now or during some period of

131 the last century” (IUCN, 2012a). The only visitors in Europe are currently the Smalltooth  
132 Sawfish (*Pristis pristis*, Linnaeus 1758), and Largetooth Sawfish (*Pristis pectinata*, Latham  
133 1794). Vagrant species were not included in assessments, which by IUCN definition are “a taxon  
134 that is currently found only occasionally within the boundaries of a region”. Vagrant species  
135 previously listed in Europe were listed as Not Applicable, and discounted from the following  
136 analyses (e.g., the Nurse Shark, *Ginglymostoma cirratum*, Bonnaterre 1788; Nieto et al., 2015).  
137 The IUCN Red List categories considered in this assessment are Least Concern, Near  
138 Threatened, Vulnerable, Endangered, Critically Endangered, and Data Deficient, as there are no  
139 sharks or rays known to be Regionally Extinct from the entire European region at present. This  
140 ordering represents lowest to highest extinction risk, with the exception of Data Deficient, which  
141 could include species that are both low and high risk.

142

## 143 **2.2 Developing an explanatory trait-based model for conservation status**

144 We considered three biological and ecological traits: maximum body size, median depth, and  
145 reproductive mode (Dulvy & Forrest, 2010; Dulvy & Reynolds, 2002; Field et al., 2009; Rigby  
146 & Simpfendorfer, 2015). Large maximum body size has been related to a greater likelihood of  
147 decline and extinction risk due to higher catchability and slower population growth rates in  
148 fishes, and other vertebrates (Dillingham et al., 2016; Field et al., 2009; Pardo et al., 2016).  
149 Deeper depth ranges are associated with refuge from fishing activity, and hence, lower extinction  
150 risk (Dulvy et al., 2014; Luiz et al., 2016). Overfishing is the greatest threat to sharks and rays  
151 and occurs predominantly down to 400 m deep and exceptionally down to greater depths (Bailey  
152 et al., 2009). Egg-laying (oviparous) species tend to be more fecund than live-bearing  
153 (viviparous) species and hence may have greater maximum population growth rates, greater

154 variance in reproductive output, and hence scope for density-dependent compensation and lower  
155 sensitivity to fishing mortality for adults (Dulvy & Forrest, 2010; Forrest et al., 2008).

156

157 There are inherent differences in biogeography, fisheries, and fisheries management between  
158 Europe's major sub-regions, the Northeast Atlantic Ocean and Mediterranean Sea, which  
159 warranted building models separately for each. There are 120 Northeast Atlantic sharks and rays  
160 and 73 Mediterranean species, so lumping the two together as a Europe-wide status created a  
161 bias towards Northeast Atlantic status. The IUCN categories were scored as Least Concern = 0,  
162 Near Threatened = 1, Vulnerable = 2, Endangered = 3, and Critically Endangered = 4 (Butchart  
163 et al., 2007). For each sub-regional model, IUCN category was the response variable and  
164 maximum body size (cm, total length), median depth (m), reproductive mode (scored oviparous  
165 = 1 or viviparous = 0). Median depth was used as a proxy for minimum depth and depth range to  
166 account for exclusively shallow or deep species' distributions, while also avoiding having two  
167 highly correlated fixed effects within a model. We also considered the interaction between size  
168 and depth as a fixed effect. The interaction between size and depth is important because large-  
169 bodied species are only associated with higher extinction risk if they exist within the reach of  
170 fisheries (Dulvy et al., 2014). Size and depth were centred and scaled by two standard deviations.  
171 Family was included as a random effect to account for phylogenetic covariation.

172

### 173 **2.3 Predicting conservation status**

174 Predictive accuracy of the explanatory model was evaluated using Area Under the Curve (AUC)  
175 from Receiver Operating Characteristic curves (Sing et al., 2005). The AUC measure only works  
176 for binary classification, so to test the predictive accuracy of each of the five categories



177 individually we scored each of the five IUCN categories separately as one, against all four other  
178 categories scored as zero. We also grouped the threatened categories (Critically Endangered,  
179 Endangered, Vulnerable) with a score of one, and non-threatened (Near Threatened, Least  
180 Concern) scored as zero to determine the model accuracy for predicting threatened versus non-  
181 threatened species. Predictive power was tested using data-sufficient species by dropping species  
182 from the model to predict the conservation status and cross-validate against each known,  
183 assessed conservation status. Test sets were run, comprising all data-sufficient species with all  
184 species dropped one at a time. The model for each sub-region that was able to predict the correct  
185 IUCN status with the highest AUC predictive accuracy measure was then used to predict the  
186 categories of the actual Data Deficient species. The highest overall accuracy for a model was  
187 determined by calculating the mean across all five AUC values for each IUCN category. Finally,  
188 the IUCN categorisation for each Data Deficient species was classified using a 50% cut-off  
189 point. All analyses were conducted in R version 3.5.2 (R Core Team, 2018), models were fit  
190 using the `clmm2` function from the `ordinal` package (Christensen, 2019), and performance was  
191 evaluated with the `ROCR` package, version 1.0-7 (Sing et al., 2005).

192

193

## 194 **3 RESULTS**

### 195 **3.1 IUCN regional European Red List assessment**

196 One-fifth of the 120 Northeast Atlantic (22%,  $n=26$ ) and 73 Mediterranean Sea (21%,  $n=15$ )  
197 shark and ray species assessed in 2015 are listed as Data Deficient (Figure 1, Table 1). Most  
198 species are assessed as Least Concern (38%) in the Northeast Atlantic, whereas the majority of  
199 species are Critically Endangered (27%) in the Mediterranean Sea (Figure 1). Specifically, of the

200 data-sufficient Northeast Atlantic assessments, 38% ( $n=46$ ) of species are Least Concern, 10%  
201 (12) Near Threatened, 8% (9) Vulnerable, 13% (15) Endangered, and 10% (12) Critically  
202 Endangered (Figure 1, Table 1). In the Mediterranean Sea, only 16% (12) species are Least  
203 Concern, 11% (8) Near Threatened, 10% (7) Vulnerable, 15% (11) Endangered, and 27% (20)  
204 Critically Endangered (Figure 1, Table 1). Sharks and rays are more threatened in Europe than  
205 the global average (17.4%,  $n=181$ ; Table 1). Specifically, nearly one-third (30%,  $n=36$ ) are  
206 threatened in the Northeast Atlantic and over half (52%,  $n=38$ ) are threatened in the  
207 Mediterranean Sea. Rays are approximately as threatened as sharks in both regions, in the  
208 Northeast Atlantic 32% ( $n=14$ ) of rays are threatened versus 33% ( $n=22$ ) of sharks, and in the  
209 Mediterranean Sea 50% ( $n=16$ ) of rays are threatened versus 55% ( $n=22$ ) of sharks (Table 1).

210

### 211 **3.2 Biological and ecological predictors of conservation status**

212 Large-bodied sharks and rays are more likely to be in higher categories of threat across Europe,  
213 particularly in the Mediterranean Sea where threat levels are generally higher (Figure 2a,b).  
214 When considering maximum body size in the Northeast Atlantic only, for every one unit increase  
215 in maximum body size (i.e. cm total length), the odds of a species being in an IUCN category of  
216 equal or higher threat increase by 0.98 (Figure 3a, Table S1). Similarly, in the Mediterranean  
217 Sea, for every one unit increase in maximum body size, the odds of a species being in an IUCN  
218 category of equal or higher threat increase by 0.94 (Figure 3a, Table S1). All other things being  
219 equal, a shark or ray of three metres total length in the Northeast Atlantic has a 71.7%  
220 probability of being in a threatened category (e.g. the Sandbar Shark, *Carcharhinus plumbeus*,  
221 Nardo 1827) compared to a 1.5 m species, which has a 39.4% probability of the same (e.g. the  
222 Angular Roughshark, *Oxynotus centrina*, Linnaeus 1758; Figure 2a). Whereas, in the

223 Mediterranean Sea the Sandbar Shark is 84.5% likely to be in a threatened category and the  
224 Angular Roughshark is 62.1% likely to be threatened in this sub-region (Figure 2b). Hence, the  
225 conservation status of a 1.5 m shark or ray in the Mediterranean Sea is closer to that of a three  
226 metre species in the Northeast Atlantic, showing much less difference in likely conservation  
227 status between similar sized species in the Mediterranean Sea.

228

229 Sharks and rays with greater depth distributions are more likely to be in lower categories of  
230 threat in the Northeast Atlantic (Figure 2c), but this pattern is muted in the Mediterranean Sea  
231 because threat levels are generally high for species across all depth distributions (Figure 2d).  
232 When considering median depth in the Northeast Atlantic only, for every one unit increase in  
233 median depth (i.e. metres), the odds of a species being in an IUCN category of higher threat  
234 decrease by 0.04 (Figure 3c, Table S1). In the Mediterranean Sea, for every one unit increase in  
235 median depth, the odds of a species being in a higher category of threat decrease by 0.24 (Figure  
236 3c, Table S1). A similar-sized shark or ray with a median depth of 200 m has a 60% chance of  
237 being threatened in the Northeast Atlantic (e.g. the Nursehound, *Scyliorhinus stellaris*, Linnaeus  
238 1758), compared with a species with a median depth of 1,000 m (e.g. the Blackmouth Catshark,  
239 *Galeus melastomus*, Rafinesque 1810), which has a 21.5% chance of being threatened in the  
240 same sub-region (Figure 2c). In the Mediterranean Sea the difference in risk is muted because of  
241 the greater reach of fisheries there: the Nursehound is 71.1% likely to be threatened, while the  
242 Blackmouth Catshark is 40.6% likely to be threatened in this sub-region (Figure 2d). Again,  
243 there is less differentiation between shallow and deepwater conservation status for  
244 Mediterranean species than Northeast Atlantic, and a higher likelihood of being threatened  
245 overall.

246

247 When maximum size, median depth, and reproductive mode are all considered, the odds of an  
248 egg-laying (oviparous) species being in a higher threat category decrease by 0.14 in the  
249 Northeast Atlantic (Figure 3b, Table S1). This effect was not significant in the Mediterranean  
250 Sea, again because the trait sensitivity is overridden or muted by the higher degree of exposure to  
251 fishing (Figure 3b, Table S1).

252

253 The most at-risk shark and ray species across Europe are therefore larger-bodied species  
254 restricted to the most heavily fished 0–400 m depth zone. The interaction between size and depth  
255 is such that for every unit increase in both size (cm) and depth (m), the odds of a shark or ray  
256 being in a higher category of threat decrease by 0.02 in the Northeast Atlantic, and by 0.05 in the  
257 Mediterranean Sea (Figure 3d, Table S1).

258

### 259 **3.3 Predicted versus evaluated conservation status**

260 The model with highest predictive accuracy (AUC) for both European sub-regions includes body  
261 size, reproductive mode, and the interaction between size and depth (Table 2, Figure 3). For the  
262 Northeast Atlantic, more than eight times out of ten, the top model predicts the correct category  
263 for the Critically Endangered, Endangered, Least Concern, or grouped threatened categories  
264 (Table S2). The Vulnerable category is predicted correctly more than six times out of ten, and the  
265 Near Threatened less than four times out of ten. The top model for the Mediterranean Sea  
266 predicts the Least Concern category correctly more than eight times out of then, and the  
267 Critically Endangered and Near Threatened categories more than seven times out of ten. Both  
268 sub-regional top models are weaker at predicting mid-range categories, with the Endangered

269 category predicted correctly less than five times and the Vulnerable category less than six times  
270 out of ten (Table S2).

271

272 Almost half of Northeast Atlantic, and two-thirds of Mediterranean Data Deficient sharks and  
273 rays are predicted-to-be-threatened with an elevated risk of extinction (Figure 4c). This  
274 percentage of *predicted* threatened sharks and rays is greater than *evaluated* threat levels in the  
275 Northeast Atlantic (46% *predicted* versus 38% *evaluated* threatened), and similar to *evaluated*  
276 threatened in the Mediterranean Sea (67% *predicted* versus 66% *evaluated* threatened). The 12  
277 Northeast Atlantic species predicted-to-be-threatened comprise 11 sharks and one ray (Figure  
278 4a). All 12 Northeast Atlantic predicted-to-be-threatened species range from 89–640 cm total  
279 length, with depth ranges overlapping with fishing activity, and are viviparous. The ten  
280 predicted-to-be-threatened Mediterranean species comprise nine sharks and one ray (Figure 4b,  
281 Table S3). All nine species range from 114–427 cm total length, overlap significantly with the  
282 heavily fished depth zone, and are viviparous.

283

284 The distribution of both *evaluated* and *predicted* Northeast Atlantic listings in each case shows a  
285 median categorisation of Near Threatened, whereas in the Mediterranean Sea the median  
286 categorisation for both is Endangered (Figure S1). Overall, Northeast Atlantic and Mediterranean  
287 Sea listings have opposing distributions, with the majority of Northeast Atlantic species non-  
288 threatened and the majority of Mediterranean species threatened (Figure S1).

289

290 **3.4 Europe's most threatened Data Deficient sharks and rays**

291 The species predicted to have the most elevated extinction risk (i.e. Critically Endangered)  
292 across Europe are all viviparous, large-bodied (349–640 cm total length) sharks whose median  
293 depths range from 40.5–350 m, hence overlapping greatly with the heavily fished zone (0–400 m  
294 depth; Table S3). In the Northeast Atlantic, the Great White Shark (*Carcharodon carcharias*,  
295 Linnaeus 1758) and Great Hammerhead Shark (*Sphyrna mokarran*, Rüppell 1837) are predicted  
296 to be Critically Endangered (Figure 4a; Table S3). While in the Mediterranean Sea, the Dusky  
297 Shark (*Carcharhinus obscurus*, Lesueur 1818), Copper Shark (*Carcharhinus brachyurus*,  
298 Günther 1870), and Longfin Mako (*Isurus paucus*, Guitart 1966) are predicted to be Critically  
299 Endangered (Figure 4b; Table S3). With this categorical regression approach, we identify a total  
300 of 14 Critically Endangered species in the Northeast Atlantic (approximately one third of  
301 threatened) and 23 Critically Endangered species in the Mediterranean Sea (approximately one  
302 half of threatened; Figure 5). If conservation efforts were focused on all imperilled species, i.e.  
303 the combined *evaluated*-threatened and *predicted-to-be-threatened* species, there would be a  
304 target list of 48 species to protect in the Northeast Atlantic and 48 species in the Mediterranean  
305 Sea (Table 3, Figure 5).

306

307

## 308 **4 DISCUSSION**

### 309 **4.1 Regional versus global IUCN Red List Status**

310 Here, we show that sharks and rays are proportionally more threatened in the two main sub-  
311 regions of Europe than the global reported threat rate, particularly when we account for the  
312 predicted risk status of Data Deficient species. Overall, we estimate that there are 40% (48)  
313 imperilled species (*evaluated* threatened and *predicted-to-be-threatened*) in the Northeast

314 Atlantic and 67% (48) in the Mediterranean Sea. Compared with other vertebrate groups, these  
315 threat levels not only exceed those of global sharks and rays (23.9%,  $n=249$  of 1,041, (Dulvy et  
316 al., 2014), but also that of amphibians: the most imperilled assessed group to date (41%,  $n=2,561$   
317 of 6,284, Hoffmann et al., 2010). Furthermore, whereas almost half of global sharks and rays are  
318 Data Deficient (46.8%,  $n=487$ ), approximately one-fifth of Europe's species are Data Deficient,  
319 which is also closer to global amphibian data deficiency proportionally (26%,  $n=1,597$ ;  
320 Hoffmann et al., 2010). The high levels of threat and relatively low levels of data deficiency in  
321 Europe result from the region's comparably long-standing history of fishing and data collection  
322 compared with the rest of the world (Barrett et al., 2004; Hoffmann, 1996). We next consider: (1)  
323 the biological and ecological traits driving these regional threat levels, (2) the differences  
324 between *evaluated* and *predicted* conservation status, and (3) how categorically predicting such  
325 could help narrow the focus of conservation efforts overall.

326

#### 327 **4.2 Biological and ecological predictors of conservation status**

328 Sharks and rays with both larger maximum body size and shallower depth distribution are more  
329 likely to face an elevated risk of extinction than smaller (faster-growing) species that live  
330 predominantly in deeper water. Fishing is the greatest threat to sharks and rays (McClenachan, et  
331 al., 2012), and it is greatest from 0–400 m depth, but in European waters lower levels of fishing  
332 activity occur down to at least 1,000 m (Amoroso et al., 2018; Morato et al., 2006). In waters  
333 deeper than the reach of fisheries, a species can be very large-bodied and not threatened at all,  
334 because body size has little influence over conservation status unless it is combined with a major  
335 threat (Fernandes et al., 2017; Owens & Bennett, 2000; Reynolds et al., 2005a). For example, the  
336 Goblin Shark (*Mitsukurina owstoni*, Jordan 1898) reaches 617 cm total length with a depth range

337 of 40–1,569 m. This deepwater shark is listed as Least Concern in the Northeast Atlantic as the  
338 majority of its depth range offers refuge from fishing activity. By contrast, the Common  
339 Thresher Shark (*Alopias vulpinus*, Bonnaterre 1788) reaches 573 cm total length, has a depth  
340 range of 0–366 m (i.e. entirely overlapping with the heavily fished zone), and is listed as  
341 Endangered in the same sub-region. Large body size has been associated with increased  
342 probability of extinction for numerous taxonomic groups (e.g. Cardillo et al., 2011; Comeros-  
343 Raynal et al., 2016; Field et al., 2009). Large body size is known to be correlated to a slow  
344 speed-of-life, but also as an impediment to evading capture in fishing gear. For shark and ray  
345 conservation, accounting for this relationship between size and susceptibility to capture is  
346 complicated by the issue of bycatch. More sharks and rays are threatened by incidental catch  
347 than by actual target fisheries (Dulvy et al., 2014), where their higher intrinsic sensitivity is not  
348 accounted for by fisheries management regimes that are focused on faster growing, less sensitive  
349 teleost (bony fish) species. Across Europe, the predominant fishing techniques are highly  
350 unselective, such as multi-species trawling (Smith & Garcia, 2014). The incentive for fishers to  
351 increase selectivity to benefit non-target species is low when this action would undoubtedly  
352 coincide with reduced target catch. The consequent unselective fishing of non-target species is a  
353 major driver of the high threat levels among Europe's sharks and rays and could lead to  
354 overlooked local extinctions. This predicament alone presents incentive to better understand the  
355 status of Data Deficient species, particularly in heavily fished waters such as Europe.

356

357 The conservation status of sharks and rays in the Mediterranean Sea appears much worse than  
358 the Northeast Atlantic, which can partly be explained by the lack of depth refuge for sharks and  
359 rays from heavy fishing activity in this sub-region. The Mediterranean Sea has a longer history



360 of fishing than the Northeast Atlantic, and nowadays, that fishing is not managed as efficiently as  
361 it is in the Northeast Atlantic (Fernandes et al., 2017; Smith & Garcia, 2014). A semi-enclosed  
362 sea equates to many more sites for landing catches, none of which are being consistently  
363 monitored. Further exacerbating this lack of monitoring, the Mediterranean fishery principally  
364 comprises higher numbers of smaller artisanal vessels, compared with fewer, more readily  
365 trackable commercial vessels in the Northeast Atlantic (Smith & Garcia, 2014). Semi-enclosed  
366 seas are also more susceptible to other major threatening events than open oceans, such as ocean  
367 acidification, rising temperatures, and coastal pollution and development (Caddy, 2000). Despite  
368 these logical contributors to the higher threat levels seen among Mediterranean sharks and rays,  
369 the difference in conservation status between both major European sub-regions can largely be  
370 attributed to the differing taxonomic and hence trait composition (120 Northeast Atlantic and 73  
371 Mediterranean Sea sharks and rays). There are 35 deepwater shark and ray species that exist in  
372 the Northeast Atlantic exclusively outside the reach of fisheries, and are all therefore listed as  
373 Least Concern, which do not occur in the Mediterranean Sea. If those species are removed from  
374 the Northeast Atlantic species list, we see the same number of imperilled species in each sub-  
375 region, and a much more similar overall proportion of threat (Table S4). Meanwhile, the median  
376 depths of all 73 Mediterranean Sea species overlap to some degree (if not entirely) with the  
377 heavily fished 0–400 m depth zone. This explains why median depth, and the interaction  
378 between maximum body size and median depth, are weaker explanatory variables in this sub-  
379 region: depth refuge from fishing activity simply does not exist for sharks and rays in the  
380 Mediterranean Sea.  
381

382 Perhaps the prevailing threat resultant from lacking refuge in the Mediterranean Sea also  
383 explains to some extent why oviparous species are not significantly lower-risk in this sub-region  
384 than viviparous species. Oviparity is characteristically associated with faster population growth  
385 rates than viviparity (Field et al., 2009). All of the most threatened sharks and rays in Europe are  
386 viviparous, likely because they are less able to withstand fishing pressure as effectively as  
387 typically faster-growing, egg-laying species.

388

#### 389 **4.3 Predicted versus evaluated conservation status**

390 To provide taxon-wide estimates of extinction risk in the face of uncertainty, the IUCN assumes  
391 that the fraction of threatened Data Deficient species is the same as the proportion of *evaluated-*  
392 *threatened* species. While pragmatic, this is an assumption to be tested. A recent estimate of  
393 which Data Deficient sharks and rays might be classified as Least Concern or threatened  
394 revealed 14% of Data Deficient species were *predicted-to-be-threatened* ( $n=68$  of 487), and  
395 overall 17.8% were *evaluated-threatened* (Dulvy et al., 2014). Taken together, there is an overall  
396 estimated global threat level of 23.9% imperilled sharks and rays (Dulvy et al., 2014). By  
397 comparison, this is much lower than the IUCN equal ratio approach, which hence yields an  
398 inflated estimate of 33% of sharks and rays threatened (Hoffmann et al., 2010).

399

400 This 1:1 ratio of *predicted-to-evaluated* threatened species proportions holds true for global birds  
401 (Class Aves), in which knowledge is significantly greater than for other taxa and hence there are  
402 few Data Deficient species (0.6%,  $n=63$  of 10 500; Butchart & Bird, 2010). This 1:1 ratio  
403 approach, however, yields a 50% underestimation of globally Data Deficient threatened  
404 mammals, where one-third of *evaluated* species are threatened, whereas two-thirds of Data

405 Deficient species are *predicted-to-be-threatened* (1:2, Jetz & Freckleton, 2015). In the case of  
406 mammals, reliance on this ratio could have devastating implications for species extinction rates  
407 by overlooking 50% of the recently predicted-to-be-threatened Data Deficient species.

408 Conversely, using the 1:1 ratio of *evaluated* to *predicted* threatened status would overestimate  
409 globally Data Deficient threatened groupers, for which the proportion of *evaluated* threat is  
410 actually three times higher than that of *predicted* threat (3:1, Luiz et al., 2016).

411

412 Northeast Atlantic sharks and rays have a similar threat distribution, and hence, negative  
413 conservation implications to global mammals if the IUCN's 1:1 ratio were to be relied upon  
414 (1:1.2 *evaluated* to *predicted* threat). Global sharks and rays have the opposite pattern, whereby  
415 conservation resources might be wasted on the protection of Data Deficient species according to  
416 this ratio. Yet, despite the high levels of data deficiency among Mediterranean sharks and rays  
417 compared with global birds, the present study shows this 1:1 ratio to be appropriate for this sub-  
418 regional taxonomic group also. The inconsistency in these risk ratio patterns across taxonomic  
419 groups, and geographic regions within taxonomic groups, highlights the need for taxon-specific  
420 predictions of threat among Data Deficient listings.

421

#### 422 **4.4 Updating protected species lists in Europe**

423 There are a number of lists that flag species for protection, but many of these are now out-of-  
424 date. Ideally, all of the imperilled sharks and rays in Europe would be listed in the appendices of  
425 the appropriate conservation-focused conventions in the region, and their exploitation monitored  
426 and managed accordingly. In reality, only eight of the 48 imperilled species identified here are  
427 listed on the Oslo-Paris convention in the Northeast Atlantic (Table 3). While of the 48

428 imperilled species identified here in the Mediterranean Sea, only three (and five) are listed on  
429 Appendix II (and Appendix III) of the Berne Convention, nine on Appendix III of the Barcelona  
430 Convention, and 23 on the General Fisheries Commission for the Mediterranean priority species  
431 list (Table 3). The Great Hammerhead Shark is currently one of the 24 species included on the  
432 GFCM priority species list for the Mediterranean Sea, but since the 2015 European Red List  
433 reassessment this species is considered a Vagrant in this basin. We therefore consider only 23  
434 species on the GFCM priority species list in this study (Table 3). Clearly, there is significant  
435 scope to update these lists to ensure protection of all imperilled species in both sub-regions.

436

#### 437 **4.5 Incorporating predictions into a Red List Index for 2020 target tracking**

438 Categorical predictions of IUCN status enable the inclusion of Data Deficient species in  
439 aggregate species conservation status analyses, from which they are currently excluded for all  
440 taxonomic groups. The Convention on Biological Diversity's Aichi Targets are monitored using  
441 indicators, such as the IUCN's Red List Index, which is an indicator of the change in aggregate  
442 extinction risk over time (Brooks et al., 2015). Predicting IUCN status for Data Deficient species  
443 enables their addition to such indices, which would in turn give conservation planners a more  
444 holistic idea of conservation status. With sufficient model accuracy, it is likely more informative  
445 to include these predictions in such indices than to exclude them altogether. Upon completion of  
446 the ongoing global reassessment of sharks and rays, this methodology can be extrapolated to the  
447 global dataset for inclusion in the global Red List Index. This approach would prove even more  
448 accurate for highly data-sufficient groups such as birds. Resource limitations have hindered  
449 scientists and conservationists from focusing on Data Deficient species historically, but  
450 categorical predictions of conservation status are a cost-effective solution to this shortcoming

451 (Bland et al., 2015), at least until data availability and resources allow for fully comprehensive  
452 IUCN assessment of these species. This case study, and the extrapolation to the highly Data  
453 Deficient global shark and ray dataset, will ideally be the first step towards applying this  
454 predictive approach to some more Data Deficient groups, such as plants and invertebrates.

455

456

## 457 **ACKNOWLEDGEMENTS**

458 We thank the IUCN Species Survival Commission Shark Specialist Group members, staff, and  
459 volunteers, and the IUCN head office for their logistical support throughout the Red List  
460 assessment process. In particular, we thank Alvaro Abella, David Allen, Michel Bariche, Tom  
461 Blasdale, Mohamed N Bradaï, Elena Buscher, Maurice Clarke, Simona Clo, Andrey Dolgov,  
462 Manuel Dureuil, Jim Ellis, Edward Farrell, Francesco Ferretti, Sonia Fordham, Sarah Fowler,  
463 Karen Frazer, Mariana García, Javier Guallart, Lucy Harrison, Ali Hood, Samuel Iglésias,  
464 Armelle Jung, James Kemp, Pete Kyne, Julia Lawson, Sophy McCully, Ana Nieto, Giuseppe  
465 Notarbartolo di Sciara, Caroline Pollock, Gina Ralph, Fabrizio Serena, Bernard Seret, Alen  
466 Soldo, Matthias Stehmann, Heike Zidowitz. We thank Tobias Sing, Dan Greenberg, Nathan  
467 Pacoureau, Chris Brown, and Rylee Murray for statistical advice, and members of the Dulvy  
468 Lab, Earth<sub>2</sub>Ocean Lab and Stats Beerz for comment on drafts and statistical advice.

469

470 **Funding:** The European Red List of marine fishes was a project funded by the European  
471 Commission (Directorate General for the Environment under Service Contract No.  
472 070307/2011/607526/SER/B.3). This project was funded by the Shark Conservation Fund as part  
473 of the Global Shark Trends Project. Rachel Walls and Nicholas Dulvy were supported by a

474 Natural Science and Engineering Research Council Discovery and Accelerator Award and  
475 Nicholas Dulvy was supported by the Canada Research Chairs Program. Rachel Walls was also  
476 supported by Simon Fraser University with three Graduate Fellowship awards.

477

478

## 479 REFERENCES

- 480 Amoroso, R. O., Pitcher, C. R., Rijnsdorp, A. D., McConnaughey, R. A., Parma, A. M.,  
481 Suuronen, P., ... Jennings, S. (2018). Bottom trawl fishing footprints on the world's  
482 continental shelves. *Proceedings of the National Academy of Sciences*, *115*(43), E10275–  
483 E10282. <http://doi.org/10.1073/pnas.1802379115>
- 484 Bailey, D. M., Collins, M. A., Gordon, J. D. M., Zuur, A. F., & Priede, I. G. (2009). Long-term  
485 changes in deep-water fish populations in the northeast Atlantic: A deeper reaching effect of  
486 fisheries? *Proceedings of the Royal Society B: Biological Sciences*, *276*(1664), 1965–1969.  
487 <http://doi.org/10.1098/rspb.2009.0098>
- 488 Barrett, J. H., Locker, A. M., & Roberts, C. M. (2004). The origins of intensive marine fishing in  
489 medieval Europe: the English evidence. *Proceedings of the Royal Society B: Biological*  
490 *Sciences*, *271*, 2417–2421. <http://doi.org/10.1098/rspb.2004.2885>
- 491 Bland, L. M., Bielby, J., Kearney, S., Orme, C. D. L., Watson, J. E. M., & Collen, B. (2017).  
492 Toward reassessing data-deficient species. *Conservation Biology*, *31*(3), 531–539.  
493 <http://doi.org/10.1111/cobi.12850>
- 494 Bland, L. M., & Böhm, M. (2016). Overcoming data deficiency in reptiles. *Biological*  
495 *Conservation*, *204*, 16–22. <http://doi.org/10.1016/j.biocon.2016.05.018>
- 496 Bland, L. M., Collen, B., Orme, C. D. L., & Bielby, J. (2012). Data uncertainty and the

- 497 selectivity of extinction risk in freshwater invertebrates. *Diversity and Distributions*, 18(12),  
498 1211–1220. <http://doi.org/10.1111/j.1472-4642.2012.00914.x>
- 499 Bland, L. M., Collen, B., Orme, C. D. L., & Bielby, J. (2014). Predicting the conservation status  
500 of data-deficient species. *Conservation Biology*, 29(1), 250–259.  
501 <http://doi.org/10.1111/cobi.12372>
- 502 Bland, L. M., Collen, B., Orme, C. D. L., & Bielby, J. (2015). Predicting the conservation status  
503 of data-deficient species. *Conservation Biology*, 29(1), 250–259.  
504 <http://doi.org/10.1111/cobi.12372>
- 505 Bland, L. M., Orme, C. D. L., Bielby, J., Collen, B., Nicholson, E., & McCarthy, M. A. (2015).  
506 Cost-effective assessment of extinction risk with limited information. *Journal of Applied*  
507 *Ecology*, 52(4), 861–870. <http://doi.org/10.1111/1365-2664.12459>
- 508 Böhm, M., Collen, B., Baillie, J. E. M., Bowles, P., Chanson, J., Cox, N., ... Zug, G. (2013). The  
509 conservation status of the world's reptiles. *Biological Conservation*, 157, 372–385.  
510 <http://doi.org/10.1016/j.biocon.2012.07.015>
- 511 Brooks, T. M., Butchart, S. H. M., Cox, N. A., Heath, M., Hilton-Taylor, C., Hoffmann, M., ...  
512 Smart, J. (2015). Harnessing biodiversity and conservation knowledge products to track the  
513 Aichi Targets and Sustainable Development Goals. *Biodiversity*, 16(2–3), 157–174.  
514 <http://doi.org/10.1080/14888386.2015.1075903>
- 515 Butchart, S. H. M., Akçakaya, H. R., Chanson, J., Baillie, J. E. M., Collen, B., Quader, S., ...  
516 Hilton-Taylor, C. (2007). Improvements to the Red List Index. *PLoS ONE*, 2(1).  
517 <http://doi.org/10.1371/journal.pone.0000140>
- 518 Butchart, S. H. M., & Bird, J. P. (2010). Data Deficient birds on the IUCN Red List: What don't  
519 we know and why does it matter? *Biological Conservation*, 143(1), 239–247.

- 520 <http://doi.org/10.1016/j.biocon.2009.10.008>
- 521 Caddy, J. (2000). Marine catchment basin effects versus impacts of fisheries on semi-enclosed  
522 seas. *ICES Journal of Marine Science*, 57(3), 628–640.  
523 <http://doi.org/10.1006/jmsc.2000.0739>
- 524 Callmander, M. W., Schatz, G. E., & Lowry, P. P. (2005). IUCN Red List assessment and the  
525 Global Strategy for Plant Conservation: Taxonomists must act now. *Taxon*, 54(4), 1047–  
526 1050. <http://doi.org/10.2307/25065491>
- 527 Cardillo, M., Mace, G., Jones, K. E., Bielby, J., Bininda-Emonds, O. R. P., Sechrest, W., ...  
528 Purvis, A. (2005). Multiple causes of high extinction risk in large mammal species. *Science*,  
529 309(5738), 1239–1241.
- 530 Cardillo, M., Mace, G. M., Jones, K. E., Bielby, J., Bininda-emonds, O. R. P., & Sechrest, W.  
531 (2011). Multiple Causes of High Extinction Risk in Large Mammal Species. *Science*,  
532 1239(2005), 1239–1241. <http://doi.org/10.1126/science.1116030>
- 533 CBD, & UNEP. (2011). The Strategic Plan for Biodiversity 2011–2020 and the Aichi Targets  
534 “Living in Harmony with Nature.” *A Ten-Year Framework for Action by All Countries and*  
535 *Stakeholders to Save Biodiversity and Enhance Its Benefits for People. Secretariat of the*  
536 *Convention*, 2. Retrieved from [www.cbd.int](http://www.cbd.int)
- 537 Christensen, R. H. B. (2019). Package ‘ordinal.’ Retrieved from [https://cran.r-](https://cran.r-project.org/web/packages/ordinal/ordinal.pdf)  
538 [project.org/web/packages/ordinal/ordinal.pdf](https://cran.r-project.org/web/packages/ordinal/ordinal.pdf)
- 539 Collen, B., Böhm, M., Kemp, R., & Baillie, J. E. M. (2012). *Spineless: status and trends of the*  
540 *world’s invertebrates*. London, United Kingdom.
- 541 Comeros-Raynal, M. T., Polidoro, B. A., Broatch, J., Mann, B. Q., Gorman, C., Buxton, C. D.,  
542 ... Carpenter, K. E. (2016). Key predictors of extinction risk in sea breams and porgies



- 543 (Family: Sparidae). *Biological Conservation*, 202, 88–98.
- 544 <http://doi.org/10.1016/j.biocon.2016.08.027>
- 545 Cortés, E. (2000). Life history patterns and correlations in sharks. *Reviews in Fisheries Science*,
- 546 8(4), 299–344.
- 547 Dillingham, P. W., Moore, J. E., Fletcher, D., Cortés, E., Alexandra Curtis, K., James, K. C., &
- 548 Lewison, R. L. (2016). Improved estimation of intrinsic growth rmax for long-lived species:
- 549 Integrating matrix models and allometry. *Ecological Applications*, 26(1), 322–333.
- 550 <http://doi.org/10.1890/14-1990>
- 551 Dulvy, N., Allen, D., Ralph, G., & Walls, R. (2016). The conservation status of Sharks, Rays and
- 552 in the Mediterranean Sea., 6+6 pp.
- 553 Dulvy, N., & Forrest, R. (2010). Life histories, population dynamics, and extinction risks in
- 554 chondrichthyans. In J. Carrier, J. Musick, & M. Heithaus (Eds.), *Sharks and Their Relatives*
- 555 *II: Biodiversity, Adaptive Physiology, and Conservation* (pp. 635–676). CRC Press: Boca
- 556 Raton.
- 557 Dulvy, N. K., & Forrest, R. E. (2010). Biodiversity, adaptive physiology, and conservation. In J.
- 558 C. Carrier, J. A. Musick, & M. R. Heithaus (Eds.), *Sharks and their relatives II* (pp. 640–
- 559 670). Boca Raton, FL: CRC Press.
- 560 Dulvy, N. K., Fowler, S. L., Musick, J. A., Cavanagh, R. D., Kyne, P. M., Harrison, L. R., ...
- 561 White, W. T. (2014). Extinction risk and conservation of the world's sharks and rays. *ELife*,
- 562 3. <http://doi.org/10.7554/eLife.00590>
- 563 Dulvy, N. K., & Reynolds, J. D. (2002). Predicting extinction vulnerability in skates.
- 564 *Conservation Biology*, 16(2), 440–450. <http://doi.org/10.1046/j.1523-1739.2002.00416.x>
- 565 Fernandes, P. G., Ralph, G. M., Nieto, A., García Criado, M., Vasilakopoulos, P., Maravelias, C.

- 566 D., ... Carpenter, K. E. (2017). Coherent assessments of Europe's marine fishes show  
567 regional divergence and megafauna loss. *Nature Ecology & Evolution*, 1(May), 0170.  
568 <http://doi.org/10.1038/s41559-017-0170>
- 569 Field IC, Meekan M, Buckworth RC, & Bradshaw CJA. (2009). *Susceptibility of Sharks, Rays*  
570 *and Chimeras to Global Extinction. Advances in Marine Biology* (1st ed., Vol. 56). Elsevier  
571 Ltd. [http://doi.org/10.1016/S0065-2881\(09\)56004-X](http://doi.org/10.1016/S0065-2881(09)56004-X)
- 572 Forrest, R. E., Martell, S. J. D., Melnychuk, M. C., & Walters, C. J. (2008). An age-structured  
573 model with leading management parameters, incorporating age-specific selectivity and  
574 maturity. *Canadian Journal of Fisheries and Aquatic Sciences*, 65(2), 286–296.  
575 <http://doi.org/10.1139/f07-156>
- 576 Hoffmann, M., Hilton-taylor, C., Angulo, A., Böhm, M., Brooks, T. M., Butchart, S. H. M., ...  
577 Russell, A. (2010). The Impact of Conservation on the Status of the World's Vertebrates.  
578 *Science*, 330(6010), 1503–1509. <http://doi.org/10.1126/science.1194442>
- 579 Hoffmann, R. C. (1996). Economic Development and Aquatic Ecosystems in Medieval Europe.  
580 *American Historical Review*, 101, 631–669. <http://doi.org/10.4324/9781315252094-5>
- 581 Iglésias, S. P., Toulhoat, L., & Sellos, D. Y. (2010). Taxonomic confusion and market  
582 mislabelling of threatened skates: important consequences for their conservation status.  
583 *Aquatic Conservation: Marine and Freshwater Ecosystems*, 20(3), 319–333.  
584 <http://doi.org/10.1002/aqc.1083>
- 585 IUCN. (2012a). *Guidelines for application of IUCN Red List criteria at regional and national*  
586 *levels: Version 4.0* (4th ed.). Gland, Switzerland and Cambridge, UK: IUCN, Gland,  
587 Switzerland. Retrieved from [www.iucn.org/publications](http://www.iucn.org/publications)
- 588 IUCN. (2012b). *IUCN Red List Categories and Criteria: version 3.1*. (IUCN, Ed.) (Second).

- 589 Gland, Switzerland and Cambridge, UK: IUCN, Gland, Switzerland.
- 590 [http://doi.org/https://www.iucnredlist.org/static/categories\\_criteria\\_3\\_1](http://doi.org/https://www.iucnredlist.org/static/categories_criteria_3_1)
- 591 Jetz, W., & Freckleton, R. P. (2015). Towards a general framework for predicting threat status of  
592 data-deficient species from phylogenetic, spatial and environmental information.  
593 *Philosophical Transactions of the Royal Society of London. Series B, Biological Sciences*,  
594 370(1662), 20140016. <http://doi.org/10.1098/rstb.2014.0016>
- 595 Luiz, O. J., Woods, R. M., Madin, E. M. P., & Madin, J. S. (2016). Predicting IUCN Extinction  
596 Risk Categories for the World's Data Deficient Groupers (Teleostei: Epinephelidae).  
597 *Conservation Letters*, 9(5), 342–350. <http://doi.org/10.1111/conl.12230>
- 598 McClenachan, L., Cooper, A. B., Carpenter, K. E., & Dulvy, N. K. (2012). Extinction risk and  
599 bottlenecks in the conservation of charismatic marine species. *Conservation Letters*, 5(1),  
600 73–80. <http://doi.org/10.1111/j.1755-263X.2011.00206.x>
- 601 McKinney, M. L. (1997). Extinction vulnerability and selectivity: Combining ecological and  
602 paleontological views. *Annual Review of Ecology and Systematics*, 28(1), 495–516.  
603 <http://doi.org/10.1146/annurev.ecolsys.28.1.495>
- 604 Morato, T., Watson, R., Pitcher, T. J., & Pauly, D. (2006). Fishing down the deep, 23–33.
- 605 Nieto, a., Ralph, G. M., Comeros-Raynal, M. T., Kemp, J., García Criado, M., Allen, D. J., ...  
606 Williams, J. T. (2015). European Red List of Marine Fishes, 88.  
607 <http://doi.org/10.2779/082723>
- 608 Owens, I. P. F., & Bennett, P. M. (2000). Ecological basis of extinction risk in birds: Habitat  
609 loss versus human persecution and introduced predators. *PNAS*, 97(22), 12144–12148.
- 610 Pardo, S. A., Kindsvater, H. K., Cuevas-Zimbrón, E., Sosa-Nishizaki, O., Pérez-Jiménez, J. C.,  
611 & Dulvy, N. K. (2016). Growth, productivity, and relative extinction risk of a data-sparse

- 612 devil ray. *Scientific Reports*, 6, 1–10. <http://doi.org/10.1038/srep33745>
- 613 Randhawa, H. S., Poulin, R., & Krkošek, M. (2015). Increasing rate of species discovery in  
614 sharks coincides with sharp population declines: Implications for biodiversity. *Ecography*,  
615 38(1), 96–107. <http://doi.org/10.1111/ecog.00793>
- 616 Reynolds, J. D., Webb, T. J., & Hawkins, L. A. (2005a). Life history and ecological correlates of  
617 extinction risk in European freshwater fishes. *Canadian Journal of Fisheries and Aquatic  
618 Sciences*, 62(4), 854–862. <http://doi.org/10.1139/f05-066>
- 619 Reynolds, J. D., Webb, T. J., & Hawkins, L. A. (2005b). Life history and ecological correlates of  
620 extinction risk in European freshwater fishes 1, 862(August 2003), 854–862.  
621 <http://doi.org/10.1139/F05-066>
- 622 Rigby, C., & Simpfendorfer, C. A. (2015). Patterns in life history traits of deep-water  
623 chondrichthyans. *Deep-Sea Research Part II: Topical Studies in Oceanography*, 115, 30–  
624 40. <http://doi.org/10.1016/j.dsr2.2013.09.004>
- 625 Sing, T., Sander, O., Beerenwinkel, N., & Lengauer, T. (2005). ROCR: Visualizing classifier  
626 performance in R. *Bioinformatics*, 21(20), 3940–3941.  
627 <http://doi.org/10.1093/bioinformatics/bti623>
- 628 Smith, A. D. M., & Garcia, S. M. (2014). Fishery management: Contrasts in the mediterranean  
629 and the atlantic. *Current Biology*, 24(17), R810–R812.  
630 <http://doi.org/10.1016/j.cub.2014.07.031>
- 631 Stein, R. W., Mull, C. G., Kuhn, T. S., Aschliman, N. C., Davidson, L. N. K., Joy, J. B., ...  
632 Mooers, A. O. (2018). Global priorities for conserving the evolutionary history of sharks,  
633 rays and chimaeras. *Nature Ecology and Evolution*, 2(February), 1–11.  
634 <http://doi.org/10.1038/s41559-017-0448-4>

635 White, W. T., & Last, P. R. (2012). A review of the taxonomy of chondrichthyan fishes: a  
636 modern perspective. *Journal of Fish Biology*, 80(5), 901–917. <http://doi.org/10.1111/j.1095->  
637 8649.2011.03192.x  
638

639 **TABLES LEGENDS**

640 **Table 1**

641 **Global and European IUCN Red Listings of sharks and rays.** Observed number and (percent)  
642 of global (2014), Northeast Atlantic (2015), and Mediterranean Sea (2015) sharks, rays (i.e. all  
643 rays and skates), and chimaeras in each IUCN Red List category. CR: Critically Endangered,  
644 EN: Endangered, VU: Vulnerable, thr: threatened (CR+EN+VU), NT: Near Threatened, LC:  
645 Least Concern, DD: Data Deficient (\*Dulvy et al., 2014).

646

647 **Table 2**

648 **Summary of top Cumulative Link Mixed-effects Models for predicting IUCN status of**  
649 **Northeast Atlantic and Mediterranean sharks and rays.** Models included all evaluated  
650 species ( $n=94$  Northeast Atlantic and  $n=58$  Mediterranean Sea). Top predictive models for both  
651 sub-regions with  $\Delta AIC < 2$  included maximum size (cm), reproductive mode (oviparous=1,  
652 viviparous=0), and the interaction between maximum size and median depth (m). Maximum size  
653 and median depth were centred and standardised by two standard deviations. Each species was  
654 dropped one-at-a-time from the model and the IUCN status predicted. Comparison between  
655 evaluated and predicted statuses determined the predictive accuracy of each model. Model  
656 accuracy was measured as the Area Under the Curve (AUC) from the ROCR package in R  
657 version 3.5.2 (Sing et al., 2005) by scoring each category as one and all four other categories as  
658 zero to determine the predictive accuracy of all five separately (Critically Endangered,  
659 Endangered, Vulnerable, Near Threatened, Least Concern). To determine the top predictive  
660 model overall, the mean of all five category AUC values was calculated. Left to right: Loglik =  
661 log likelihood,  $AIC_c$  = AIC corrected for small sample size,  $\Delta AIC$  = delta AIC, AIC wt = AIC

662 weight, mean AUC = Area Under Curve averaged across the five AUC values for each IUCN  
663 category (see Table S2 for complete list of AUC values).

664

665 **Table 3**

666 **Current consideration of all imperilled sharks and rays in European waters by regional**

667 **conventions and priority species lists.** Relevant listings of all imperilled (i.e. *evaluated-*

668 *threatened* and *predicted-to-be-threatened*) sharks and rays in Europe on regional and global

669 protection-focused conventions, by major sub-region (Northeast Atlantic then Mediterranean

670 Sea). Blanks indicate no listing, while hyphens indicate inapplicability of a convention to a

671 species within a certain sub-region. Where a convention has multiple appendices, the applicable

672 appendix number is indicated (e.g. A2, A3) instead of a tick mark. Species are listed

673 taxonomically within each threatened IUCN category – Critically Endangered (CR), Endangered

674 (EN), and Vulnerable (VU) – in descending order of threat. Conventions left to right: Oslo-Paris

675 Convention (OSPAR; applicable to Northeast Atlantic Ocean only); Berne Convention

676 (applicable to Mediterranean Sea only); Barcelona Convention (Mediterranean Sea only); and

677 the General Fisheries Commission for the Mediterranean (GFCM) priority species list

678 (Mediterranean Sea only). The Great Hammerhead Shark (*Sphyrna mokarran*) is currently one of

679 24 species included on the GFCM priority species list, but has not been included in the

680 Mediterranean section of this table as it is now considered a Vagrant species in the

681 Mediterranean Sea, as per IUCN definition (IUCN, 2012a).

682 **FIGURE LEGENDS**

683 **Figure 1**

684 **Percent *evaluated* and *predicted* IUCN categorisations of Europe's sharks and rays.** Dark  
685 bars represent the percentage of species officially evaluated on the IUCN Red List, while light  
686 bars represent the percentage of Data Deficient species predicted to be under each category as  
687 per the results of the present study. Of the 120 species in the Northeast Atlantic, 94 were  
688 *evaluated* and 26 were Data Deficient and *predicted* for. In the Mediterranean Sea, 58 of 73  
689 species were *evaluated* and 15 were Data Deficient and *predicted* for. The IUCN categories from  
690 highest to lowest threat are: CR = Critically Endangered, EN = Endangered, VU = Vulnerable,  
691 NT = Near Threatened, and LC = Least Concern.

692

693 **Figure 2**

694 **The effects of size and depth on shark and ray conservation status in Europe.** Histograms of  
695 the probability of an evaluated shark or ray being listed as either Critically Endangered (CR),  
696 Endangered (EN), Vulnerable (VU), Near Threatened (NT), or Least Concern (LC) based on  
697 single-trait Cumulative Link Mixed-effects Model outputs for maximum body size (cm; panels a  
698 and b) and median depth (m; panels c and d). Data include all evaluated species ( $n=94$  Northeast  
699 Atlantic, panels a and c; and  $n=58$  Mediterranean Sea, panels b and d) and exclude all Data  
700 Deficient species. Dark grey vertical bars indicate large (300 cm total length, a,b) or shallow  
701 (200 m median depth, c,d) species; light grey bars represent small (150 cm total length, a,b) or  
702 deep (1,000 m median depth, c,d) species. Brackets beside bars indicate the probability of each  
703 species being categorised as threatened (CR, EN, or VU) on the IUCN Red List.

704



705 **Figure 3**

706 **Effects of biological and ecological traits on Europe's shark and ray conservation status.**

707 Standardized effect sizes with 95% confidence intervals. Cumulative link mixed effect models  
708 with maximum body size (a), reproductive mode (b), median depth (c), and the interaction  
709 between size and depth (d) as fixed effects and taxonomic Family as a random effect to account  
710 for phylogenetic non-independence. Circular and triangular points represent the best explanatory  
711 and predictive model for the Northeast Atlantic and Mediterranean Sea, respectively, which in  
712 both cases included maximum body size, reproductive mode, and the interaction between  
713 maximum size and median depth. Data for maximum size and median depth were centred and  
714 standardised by two standard deviations, while reproductive mode is a binary trait where  
715 oviparous species = 1 and viviparous species = 0.

716

717 **Figure 4**

718 ***Predicted and evaluated conservation status of Europe's sharks and rays.*** Top Cumulative  
719 Link Mixed-effect Models including maximum body size, reproductive mode, and the  
720 interaction between size and median depth as fixed effects (for both sub-regions) and taxonomic  
721 Family as a random effect to account for phylogenetic non-independence. Panel a shows the  
722 probability of all 26 Data Deficient Northeast Atlantic species, and panel b of all 15  
723 Mediterranean Sea species, being in each IUCN Red List category based on these top  
724 explanatory models. The vertical line cutting down panels a and b represents the 50% cut-off  
725 classification used to assign the final IUCN categorisations (according to the category bar the  
726 line crosses). Data for size and depth were centred and standardised by two standard deviations,  
727 while reproductive mode is a binary trait where oviparous species = 1 and viviparous species = 0.

728 Panel c shows the proportion of sharks and rays in the Northeast Atlantic (left) and  
729 Mediterranean Sea (right) both *evaluated* and *predicted* to be in each IUCN category. Percentage  
730 values within each yellow bar indicate the total percentage of *evaluated* threatened and  
731 *predicted-to-be-threatened* species in each set, while numbers within brackets below each bar  
732 indicate the total number of species included in each set

733

### 734 **Figure 5**

735 **Informing shark and ray conservation efforts in Europe with categorical predictions.** Solid

736 grey bars represent species of all IUCN categories excluding those officially evaluated by the

737 IUCN as Critically Endangered (CR), which are represented by solid red blocks. There are 120

738 shark and ray species in the Northeast Atlantic (left) and 73 in the Mediterranean Sea (right).

739 Horizontal red lines indicate the addition of all Data Deficient species *predicted* to be Critically

740 Endangered, to the *evaluated* block. Orange lines indicate all *evaluated* and *predicted-to-be-*

741 Endangered and Critically Endangered species, while yellow lines show all imperilled (i.e.

742 *evaluated* and *predicted-to-be-threatened*) species (Vulnerable, Endangered, and Critically

743 Endangered). Numbers beside bars indicate total number of species within each relevant

744 grouping.

745 **TABLES**

746 **Table 1**

747 **Global and European IUCN Red Listings of sharks and rays.** Observed number and (percent) of global (2014), Northeast Atlantic  
 748 (2015), and Mediterranean Sea (2015) sharks, rays (i.e. all rays and skates), and chimaeras in each IUCN Red List category. CR:  
 749 Critically Endangered, EN: Endangered, VU: Vulnerable, thr: threatened (CR+EN+VU), NT: Near Threatened, LC: Least Concern,  
 750 DD: Data Deficient (\*Dulvy et al., 2014).

| <b>Geographic scope</b>        | <b>Total thr</b>     |                    |                     |                     |                     |                     |                     |                     |
|--------------------------------|----------------------|--------------------|---------------------|---------------------|---------------------|---------------------|---------------------|---------------------|
|                                | <b>Total species</b> | <b>species (%)</b> | <b>Total CR (%)</b> | <b>Total EN (%)</b> | <b>Total VU (%)</b> | <b>Total NT (%)</b> | <b>Total LC (%)</b> | <b>Total DD (%)</b> |
| All global*                    | 1,041                | 181(17)            | 25(2)               | 43(4)               | 113(11)             | 132(13)             | 241(23)             | 487(47)             |
| All Northeast Atlantic         | 120                  | 38(32)             | 12(10)              | 15(13)              | 11(9)               | 12(10)              | 48(40)              | 22(18)              |
| All Mediterranean Sea          | 73                   | 39(53)             | 20(27)              | 11(15)              | 8(11)               | 9(12)               | 12(17)              | 13(18)              |
| Rays (Northeast Atlantic)      | 44                   | 14(32)             | 6(14)               | 3(7)                | 5(11)               | 6(14)               | 22(50)              | 2(4)                |
| Sharks (Northeast Atlantic)    | 67                   | 22(33)             | 6(9)                | 12(18)              | 4(6)                | 5(7)                | 16(24)              | 24(36)              |
| Chimaeras (Northeast Atlantic) | 9                    | -                  | -                   | -                   | -                   | 1(10)               | 8(90)               | -                   |
| Rays (Mediterranean)           | 32                   | 16(50)             | 8(25)               | 5(16)               | 3(9)                | 5(16)               | 7(22)               | 4(12)               |
| Sharks (Mediterranean)         | 40                   | 22(55)             | 12(30)              | 6(15)               | 4(10)               | 2(5)                | 5(12.5)             | 11(27.5)            |
| Chimaeras (Mediterranean)      | 1                    | -                  | -                   | -                   | -                   | 1(100)              | -                   | -                   |

751

752

753 **Table 2**

754 **Summary of top Cumulative Link Mixed-effects Models for predicting IUCN status of Northeast Atlantic and Mediterranean**

755 **sharks and rays.** Models included all evaluated species ( $n=94$  Northeast Atlantic and  $n=58$  Mediterranean Sea). Top predictive  
 756 models for both sub-regions with  $\Delta AIC < 2$  included maximum size (cm), reproductive mode (oviparous=1, viviparous=0), and the  
 757 interaction between maximum size and median depth (m). Maximum size and median depth were centred and standardised by two  
 758 standard deviations. Each species was dropped one-at-a-time from the model and the IUCN status predicted. Comparison between  
 759 evaluated and predicted statuses determined the predictive accuracy of each model. Model accuracy was measured as the Area Under  
 760 the Curve (AUC) from the ROCR package in R version 3.5.2 (Sing et al., 2005) by scoring each category as one and all four other  
 761 categories as zero to determine the predictive accuracy of all five separately (Critically Endangered, Endangered, Vulnerable, Near  
 762 Threatened, Least Concern). To determine the top predictive model overall, the mean of all five category AUC values was calculated.  
 763 Left to right: Loglik = log likelihood,  $AIC_c$  = AIC corrected for small sample size,  $\Delta AIC$  = delta AIC, AIC wt = AIC weight, mean  
 764 AUC = Area Under Curve averaged across the five AUC values for each IUCN category (see Table S2 for complete list of AUC  
 765 values).

|                      |                                              |               |                        |             |               | <b>Mean</b> |
|----------------------|----------------------------------------------|---------------|------------------------|-------------|---------------|-------------|
| <b>Region</b>        | <b>Model hypothesis</b>                      | <b>Loglik</b> | <b>AIC<sub>c</sub></b> | <b>ΔAIC</b> | <b>AIC wt</b> | <b>AUC</b>  |
| <b>Northeast</b>     | IUCN status ~                                |               |                        |             |               |             |
| <b>Atlantic</b>      | Max size + Reproduction + Max size*Med depth | -91.553       | 201.106                | 5.684e-14   | 0.122         | 0.711       |
| <b>Mediterranean</b> | IUCN status ~                                | -71.528       | 161.055                | 1.833       | 0.066         | 0.657       |

Sea Max size + Reproduction + Max size\*Med depth

766 **Table 3**

767 **Current consideration of all imperilled sharks and rays in European waters by regional conventions and priority species lists.**

768 Relevant listings of all imperilled (i.e. *evaluated*-threatened and *predicted*-to-be-threatened) sharks and rays in Europe on regional and  
 769 global protection-focused conventions, by major sub-region (Northeast Atlantic then Mediterranean Sea). Blanks indicate no listing,  
 770 while hyphens indicate inapplicability of a convention to a species within a certain sub-region. Where a convention has multiple  
 771 appendices, the applicable appendix number is indicated (e.g. A2, A3) instead of a tick mark. Species are listed taxonomically within  
 772 each threatened IUCN category – Critically Endangered (CR), Endangered (EN), and Vulnerable (VU) – in descending order of threat.  
 773 Conventions left to right: Oslo-Paris Convention (OSPAR; applicable to Northeast Atlantic Ocean only); Berne Convention  
 774 (applicable to Mediterranean Sea only); Barcelona Convention (Mediterranean Sea only); and the General Fisheries Commission for  
 775 the Mediterranean (GFCM) priority species list (Mediterranean Sea only). The Great Hammerhead Shark (*Sphyrna mokarran*) is  
 776 currently one of 24 species included on the GFCM priority species list, but has not been included in the Mediterranean section of this  
 777 table as it is now considered a Vagrant species in the Mediterranean Sea, as per IUCN definition (IUCN, 2012a).

| Species                        | Evaluated IUCN status | Predicted IUCN status | OSPAR (NEA) | Berne Convention (Med) | Barcelona Convention (Med) | GFCM priority species (Med) |
|--------------------------------|-----------------------|-----------------------|-------------|------------------------|----------------------------|-----------------------------|
| <i>Squatina squatina</i>       | Critically Endangered | -                     | ?           | -                      | -                          | -                           |
| <i>Squatina aculeata</i>       | Critically Endangered | -                     |             | -                      | -                          | -                           |
| <i>Squatina oculata</i>        | Critically Endangered | -                     |             | -                      | -                          | -                           |
| <i>Centrophorus granulosus</i> | Critically Endangered | -                     | ?           | -                      | -                          | -                           |

| Species                         | Evaluated IUCN status | Predicted IUCN status | OSPAR (NEA) | Bern Convention (Med) | Barcelona Convention (Med) | GFCM priority species (Med) |
|---------------------------------|-----------------------|-----------------------|-------------|-----------------------|----------------------------|-----------------------------|
| <i>Odontaspis ferox</i>         | Critically Endangered | -                     | -           | -                     | -                          | -                           |
| <i>Lamna nasus</i>              | Critically Endangered | -                     | ?           | -                     | -                          | -                           |
| <i>Carcharodon carcharias</i>   | Data Deficient        | Critically Endangered | -           | -                     | -                          | -                           |
| <i>Sphyrna mokarran</i>         | Data Deficient        | Critically Endangered | -           | -                     | -                          | -                           |
| <i>Rostroraja alba</i>          | Critically Endangered | -                     | ?           | -                     | -                          | -                           |
| <i>Dipturus batis</i>           | Critically Endangered | -                     | ?           | -                     | -                          | -                           |
| <i>Pristis pristis</i>          | Critically Endangered | -                     | -           | -                     | -                          | -                           |
| <i>Pristis pectinata</i>        | Critically Endangered | -                     | -           | -                     | -                          | -                           |
| <i>Gymnura altavela</i>         | Critically Endangered | -                     | -           | -                     | -                          | -                           |
| <i>Pteromylaeus bovinus</i>     | Critically Endangered | -                     | -           | -                     | -                          | -                           |
| <i>Echinorhinus brucus</i>      | Endangered            | -                     | -           | -                     | -                          | -                           |
| <i>Centrophorus lusitanicus</i> | Endangered            | -                     | -           | -                     | -                          | -                           |
| <i>Centrophorus squamosus</i>   | Endangered            | -                     | ?           | -                     | -                          | -                           |
| <i>Deania calcea</i>            | Endangered            | -                     | -           | -                     | -                          | -                           |
| <i>Centroscymnus coelolepis</i> | Endangered            | -                     | -           | -                     | -                          | -                           |
| <i>Dalatias licha</i>           | Endangered            | -                     | -           | -                     | -                          | -                           |
| <i>Squalus acanthias</i>        | Endangered            | -                     | ?           | -                     | -                          | -                           |
| <i>Alopias vulpinus</i>         | Endangered            | -                     | -           | -                     | -                          | -                           |
| <i>Alopias superciliosus</i>    | Endangered            | -                     | -           | -                     | -                          | -                           |
| <i>Cetorhinus maximus</i>       | Endangered            | -                     | ?           | -                     | -                          | -                           |
| <i>Isurus oxyrinchus</i>        | Data Deficient        | Endangered            | -           | -                     | -                          | -                           |
| <i>Isurus paucus</i>            | Data Deficient        | Endangered            | -           | -                     | -                          | -                           |
| <i>Galeocerdo cuvier</i>        | Data Deficient        | Endangered            | -           | -                     | -                          | -                           |
| <i>Sphyrna zygaena</i>          | Data Deficient        | Endangered            | -           | -                     | -                          | -                           |
| <i>Sphyrna lewini</i>           | Data Deficient        | Endangered            | -           | -                     | -                          | -                           |
| <i>Carcharhinus plumbeus</i>    | Endangered            | -                     | -           | -                     | -                          | -                           |
| <i>Carcharhinus longimanus</i>  | Endangered            | -                     | -           | -                     | -                          | -                           |
| <i>Carcharhinus obscurus</i>    | Data Deficient        | Endangered            | -           | -                     | -                          | -                           |

| Species                         | Evaluated IUCN status | Predicted IUCN status | OSPAR (NEA) | Bern Convention (Med) | Barcelona Convention (Med) | GFCM priority species (Med) |
|---------------------------------|-----------------------|-----------------------|-------------|-----------------------|----------------------------|-----------------------------|
| <i>Carcharhinus falciformis</i> | Data Deficient        | Endangered            | -           | -                     | -                          | -                           |
| <i>Glaucostegus cemiculus</i>   | Endangered            | -                     | -           | -                     | -                          | -                           |
| <i>Rhinobatos rhinobatos</i>    | Endangered            | -                     | -           | -                     | -                          | -                           |
| <i>Mobula mobular</i>           | Endangered            | -                     | -           | -                     | -                          | -                           |
| <i>Hexanchus nakamurai</i>      | Data Deficient        | Vulnerable            | -           | -                     | -                          | -                           |
| <i>Centrophorus uyato</i>       | Vulnerable            | -                     | -           | -                     | -                          | -                           |
| <i>Oxynotus centrina</i>        | Vulnerable            | -                     | -           | -                     | -                          | -                           |
| <i>Pseudotriakis microdon</i>   | Data Deficient        | Vulnerable            | -           | -                     | -                          | -                           |
| <i>Galeorhinus galeus</i>       | Vulnerable            | -                     | -           | -                     | -                          | -                           |
| <i>Mustelus mustelus</i>        | Vulnerable            | -                     | -           | -                     | -                          | -                           |
| <i>Leucoraja circularis</i>     | Vulnerable            | -                     | -           | -                     | -                          | -                           |
| <i>Leucoraja fullonica</i>      | Vulnerable            | -                     | -           | -                     | -                          | -                           |
| <i>Rhinoptera marginata</i>     | Data Deficient        | Vulnerable            | -           | -                     | -                          | -                           |
| <i>Myliobatis aquila</i>        | Vulnerable            | -                     | -           | -                     | -                          | -                           |
| <i>Dasyatis pastinaca</i>       | Vulnerable            | -                     | -           | -                     | -                          | -                           |
| <i>Dasyatis centroura</i>       | Vulnerable            | -                     | -           | -                     | -                          | -                           |
| <i>Squatina squatina</i>        | Critically Endangered | -                     | -           | A3                    | -                          | ?                           |
| <i>Squatina aculeata</i>        | Critically Endangered | -                     | -           | -                     | -                          | ?                           |
| <i>Squatina oculata</i>         | Critically Endangered | -                     | -           | -                     | -                          | ?                           |
| <i>Centrophorus granulosus</i>  | Critically Endangered | -                     | -           | -                     | A3                         | -                           |
| <i>Oxynotus centrina</i>        | Critically Endangered | -                     | -           | -                     | -                          | ?                           |
| <i>Odontaspis ferox</i>         | Critically Endangered | -                     | -           | -                     | -                          | ?                           |
| <i>Carcharias taurus</i>        | Critically Endangered | -                     | -           | -                     | -                          | ?                           |
| <i>Lamna nasus</i>              | Critically Endangered | -                     | -           | A3                    | -                          | ?                           |
| <i>Carcharodon carcharias</i>   | Critically Endangered | -                     | -           | A2                    | -                          | ?                           |
| <i>Isurus oxyrinchus</i>        | Critically Endangered | -                     | -           | A3                    | -                          | ?                           |
| <i>Isurus paucus</i>            | Data Deficient        | Critically Endangered | -           | -                     | -                          | -                           |
| <i>Sphyrna zygaena</i>          | Critically Endangered | -                     | -           | -                     | -                          | ?                           |

| <i>Carcharhinus brachyurus</i> | Data Deficient        | Critically Endangered | -           |                       |                            |                             |
|--------------------------------|-----------------------|-----------------------|-------------|-----------------------|----------------------------|-----------------------------|
| <i>Carcharhinus obscurus</i>   | Data Deficient        | Critically Endangered | -           |                       |                            |                             |
| <i>Prionace glauca</i>         | Critically Endangered | -                     | -           | A3                    | A3                         |                             |
| Species                        | Evaluated IUCN status | Predicted IUCN status | OSPAR (NEA) | Bern Convention (Med) | Barcelona Convention (Med) | GFCM priority species (Med) |
| <i>Leucoraja circularis</i>    | Critically Endangered | -                     | -           |                       |                            | ?                           |
| <i>Leucoraja melitensis</i>    | Critically Endangered | -                     | -           |                       |                            | ?                           |
| <i>Leucoraja fullonica</i>     | Critically Endangered | -                     | -           |                       |                            |                             |
| <i>Dipturus batis</i>          | Critically Endangered | -                     | -           |                       |                            | ?                           |
| <i>Pristis pristis</i>         | Critically Endangered | -                     | -           |                       |                            | ?                           |
| <i>Pristis pectinata</i>       | Critically Endangered | -                     | -           |                       |                            | ?                           |
| <i>Gymnura altavela</i>        | Critically Endangered | -                     | -           |                       |                            | ?                           |
| <i>Pteromylaeus bovinus</i>    | Critically Endangered | -                     | -           |                       |                            |                             |
| <i>Hexanchus nakamurai</i>     | Data Deficient        | Endangered            | -           |                       |                            |                             |
| <i>Echinorhinus brucus</i>     | Endangered            | -                     | -           |                       |                            |                             |
| <i>Somniosus rostratus</i>     | Data Deficient        | Endangered            | -           |                       |                            |                             |
| <i>Squalus acanthias</i>       | Endangered            | -                     | -           |                       | A3                         | ?                           |
| <i>Alopias vulpinus</i>        | Endangered            | -                     | -           |                       | A3                         |                             |
| <i>Alopias superciliosus</i>   | Endangered            | -                     | -           |                       |                            |                             |
| <i>Cetorhinus maximus</i>      | Endangered            | -                     | -           | A2                    |                            | ?                           |
| <i>Carcharhinus altimus</i>    | Data Deficient        | Endangered            | -           |                       |                            |                             |
| <i>Carcharhinus plumbeus</i>   | Endangered            | -                     | -           |                       | A3                         |                             |
| <i>Carcharhinus limbatus</i>   | Data Deficient        | Endangered            | -           |                       |                            |                             |
| <i>Rostroraja alba</i>         | Endangered            | -                     | -           | A3                    |                            | ?                           |
| <i>Raja radula</i>             | Endangered            | -                     | -           |                       |                            |                             |
| <i>Glaucostegus cemiculus</i>  | Endangered            | -                     | -           |                       |                            | ?                           |
| <i>Rhinobatos rhinobatos</i>   | Endangered            | -                     | -           |                       |                            | ?                           |
| <i>Rhinoptera marginata</i>    | Data Deficient        | Endangered            | -           |                       |                            |                             |
| <i>Mobula mobular</i>          | Endangered            | -                     | -           | A2                    |                            | ?                           |
| <i>Heptranchias perlo</i>      | Data Deficient        | Vulnerable            | -           |                       | A3                         |                             |



|                             |                              |                              |                    |                              |                                   |                                    |
|-----------------------------|------------------------------|------------------------------|--------------------|------------------------------|-----------------------------------|------------------------------------|
| <i>Dalatias licha</i>       | Vulnerable                   | -                            | -                  | -                            | -                                 | ?                                  |
| <i>Galeorhinus galeus</i>   | Vulnerable                   | -                            | -                  | -                            | -                                 | ?                                  |
| <b>Species</b>              | <b>Evaluated IUCN status</b> | <b>Predicted IUCN status</b> | <b>OSPAR (NEA)</b> | <b>Bern Convention (Med)</b> | <b>Barcelona Convention (Med)</b> | <b>GFCM priority species (Med)</b> |
| <i>Mustelus asterias</i>    | Vulnerable                   | -                            | -                  | -                            | A3                                |                                    |
| <i>Mustelus punctulatus</i> | Data Deficient               | Vulnerable                   | -                  | -                            | A3                                |                                    |
| <i>Mustelus mustelus</i>    | Vulnerable                   | -                            | -                  | -                            | A3                                |                                    |
| <i>Myliobatis aquila</i>    | Vulnerable                   | -                            | -                  | -                            |                                   |                                    |
| <i>Dasyatis pastinaca</i>   | Vulnerable                   | -                            | -                  | -                            |                                   |                                    |
| <i>Dasyatis centroura</i>   | Vulnerable                   | -                            | -                  | -                            |                                   |                                    |

778

779 **FIGURES**

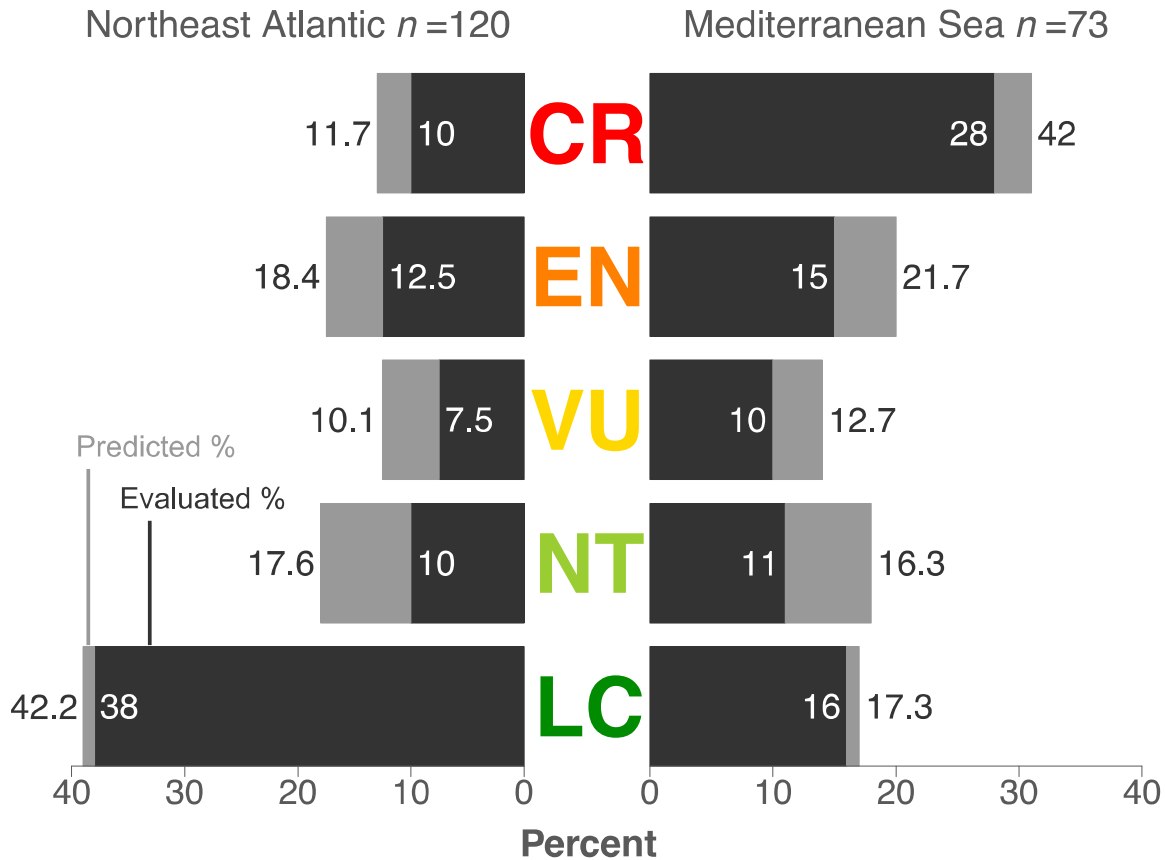

781 **Figure 1**

782 **Percent evaluated and predicted IUCN categorisations of Europe's sharks and rays.** Dark

783 bars represent the percentage of species officially evaluated on the IUCN Red List, while light

784 bars represent the percentage of Data Deficient species predicted to be under each category as

785 per the results of the present study. Of the 120 species in the Northeast Atlantic, 94 were

786 *evaluated* and 26 were Data Deficient and *predicted* for. In the Mediterranean Sea, 58 of 73

787 species were *evaluated* and 15 were Data Deficient and *predicted* for. The IUCN categories from

788 highest to lowest threat are: CR = Critically Endangered, EN = Endangered, VU = Vulnerable,

789 NT = Near Threatened, and LC = Least Concern.

790

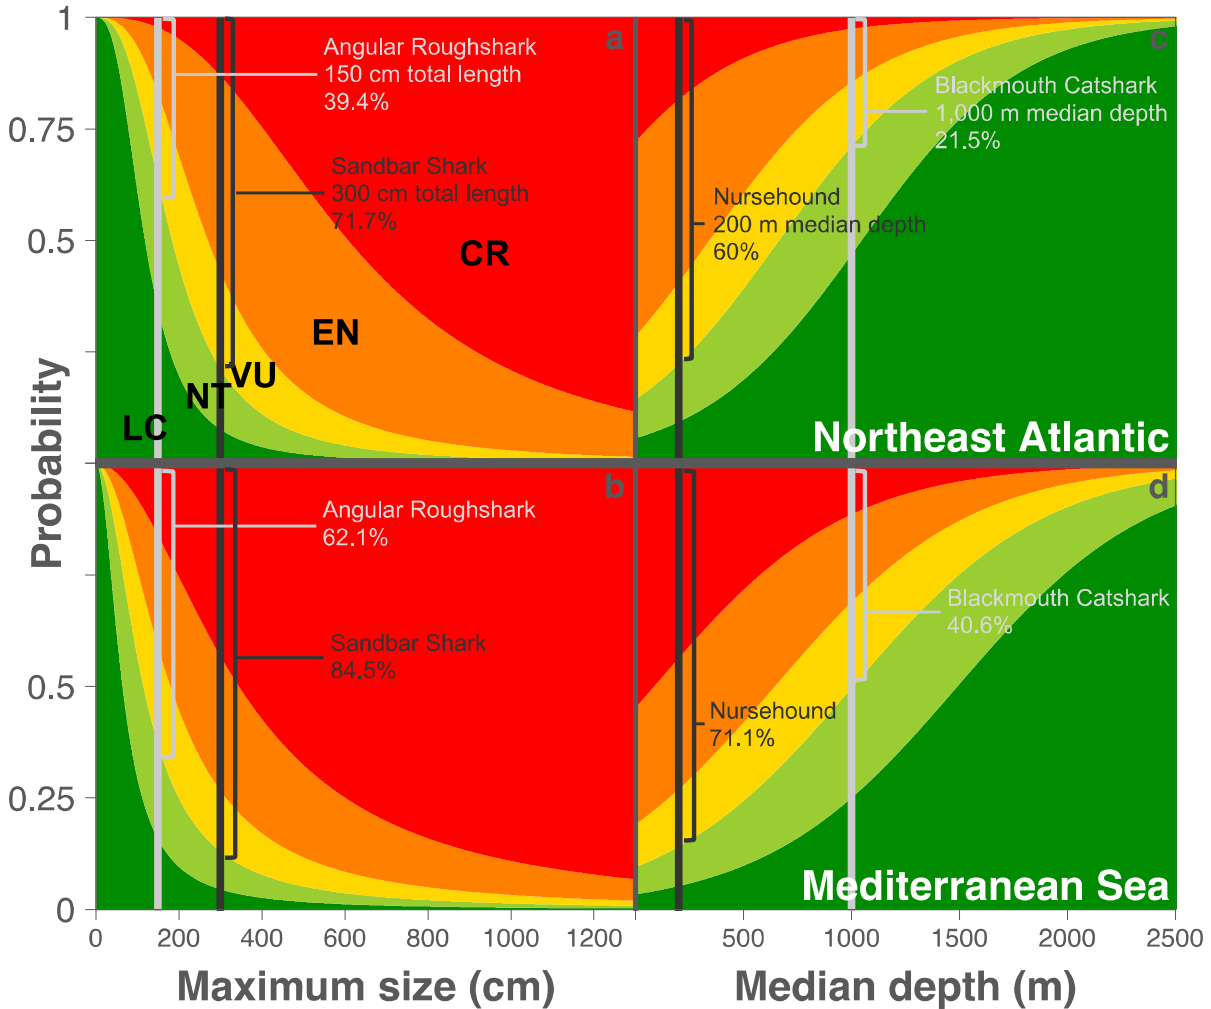

792 **Figure 2**

793 **The effects of size and depth on shark and ray conservation status in Europe.** Histograms of  
794 the probability of an evaluated shark or ray being listed as either Critically Endangered (CR),  
795 Endangered (EN), Vulnerable (VU), Near Threatened (NT), or Least Concern (LC) based on  
796 single-trait Cumulative Link Mixed-effects Model outputs for maximum body size (cm; panels a  
797 and b) and median depth (m; panels c and d). Data include all evaluated species ( $n=94$  Northeast  
798 Atlantic, panels a and c; and  $n=58$  Mediterranean Sea, panels b and d) and exclude all Data  
799 Deficient species. Dark grey vertical bars indicate large (300 cm total length, a,b) or shallow  
800 (200 m median depth, c,d) species; light grey bars represent small (150 cm total length, a,b) or

801 deep (1,000 m median depth, c,d) species. Brackets beside bars indicate the probability of each  
802 species being categorised as threatened (CR, EN, or VU) on the IUCN Red List.

803

804

805

806

807

808

809

810

811

812

813

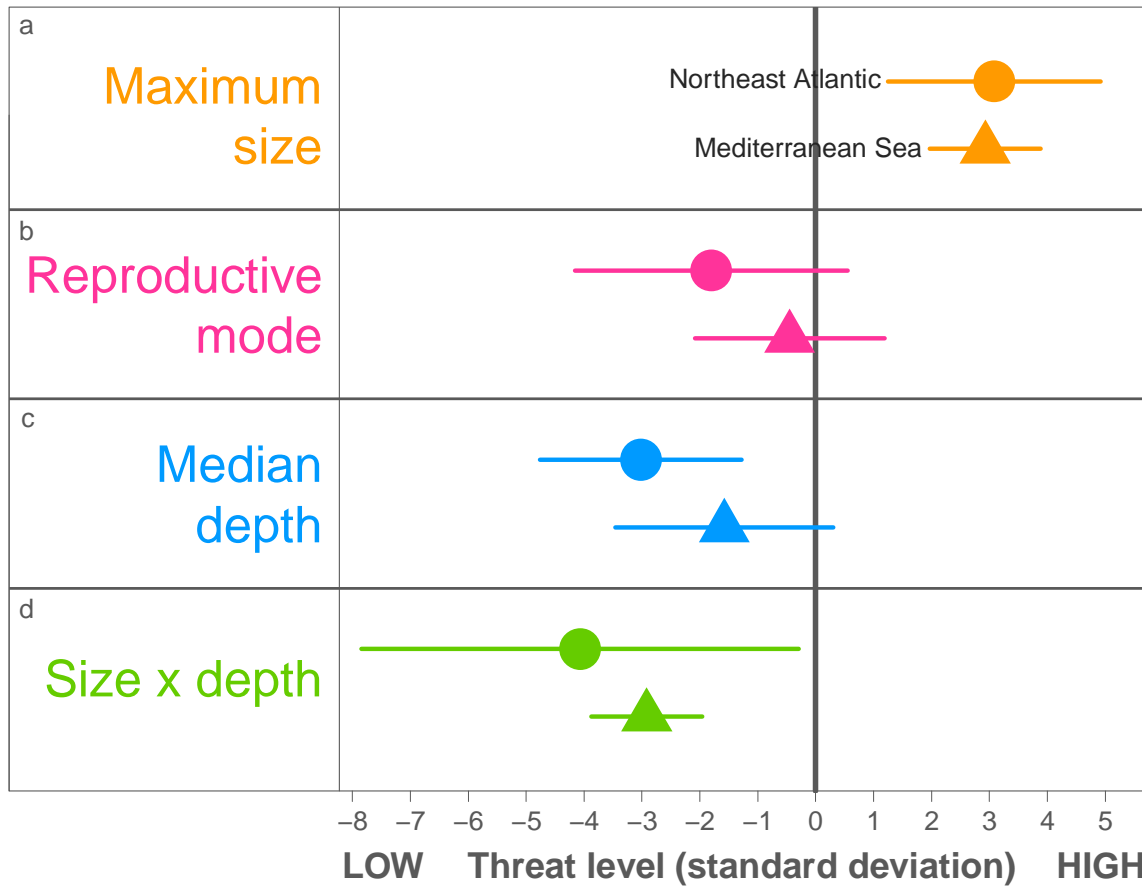

814

815 **Figure 3**

816 **Effects of biological and ecological traits on Europe's shark and ray conservation status.**

817 Standardized effect sizes with 95% confidence intervals. Cumulative link mixed effect models

818 with maximum body size (a), reproductive mode (b), median depth (c), and the interaction

819 between size and depth (d) as fixed effects and taxonomic Family as a random effect to account

820 for phylogenetic non-independence. Circular and triangular points represent the best explanatory

821 and predictive model for the Northeast Atlantic and Mediterranean Sea, respectively, which in

822 both cases included maximum body size, reproductive mode, and the interaction between

823 maximum size and median depth. Data for maximum size and median depth were centred and

824 standardised by two standard deviations, while reproductive mode is a binary trait where

825 oviparous species = 1 and viviparous species = 0.

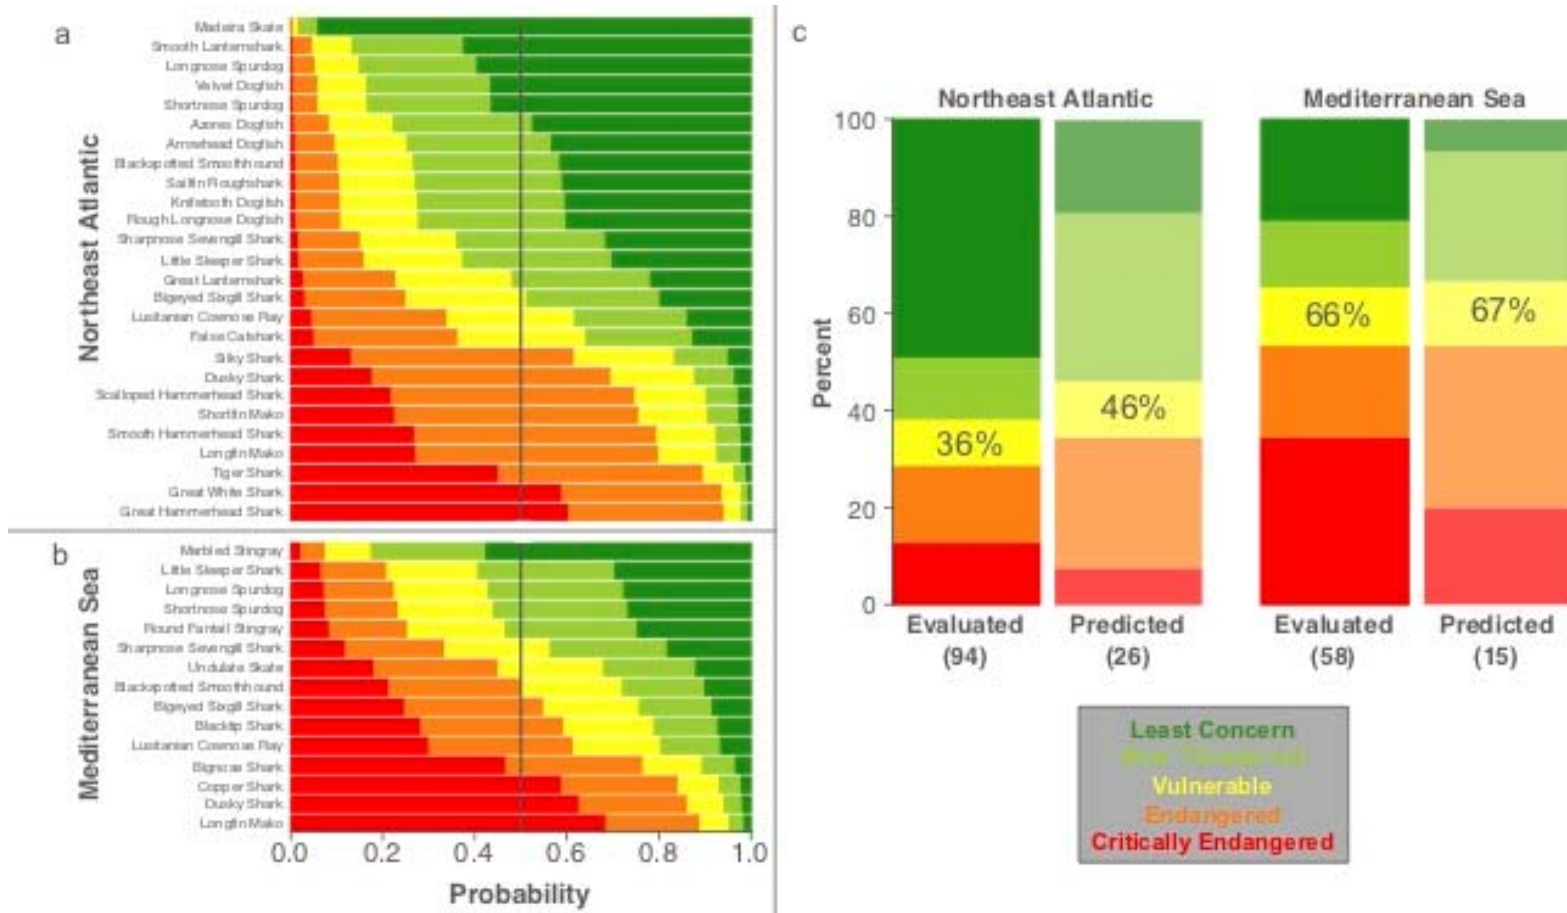

827

828 **Figure 4**829 ***Predicted and evaluated conservation status of Europe's sharks and rays.*** Top Cumulative Link Mixed-effectd Models including

830 maximum body size, reproductive mode, and the interaction between size and median depth as fixed effects (for both sub-regions) and

831 taxonomic Family as a random effect to account for phylogenetic non-independence. Panel a shows the probability of all 26 Data  
832 Deficient Northeast Atlantic species, and panel b of all 15 Mediterranean Sea species, being in each IUCN Red List category based on  
833 these top explanatory models. The vertical line cutting down panels a and b represents the 50% cut-off classification used to assign the  
834 final IUCN categorisations (according to the category bar the line crosses). Data for size and depth were centred and standardised by  
835 two standard deviations, while reproductive mode is a binary trait where oviparous species = 1 and viviparous species = 0. Panel c  
836 shows the proportion of sharks and rays in the Northeast Atlantic (left) and Mediterranean Sea (right) both *evaluated* and *predicted* to  
837 be in each IUCN category. Percentage values within each yellow bar indicate the total percentage of *evaluated* threatened and  
838 *predicted-to-be-threatened* species in each set, while numbers within brackets below each bar indicate the total number of species  
839 included in each set.  
840

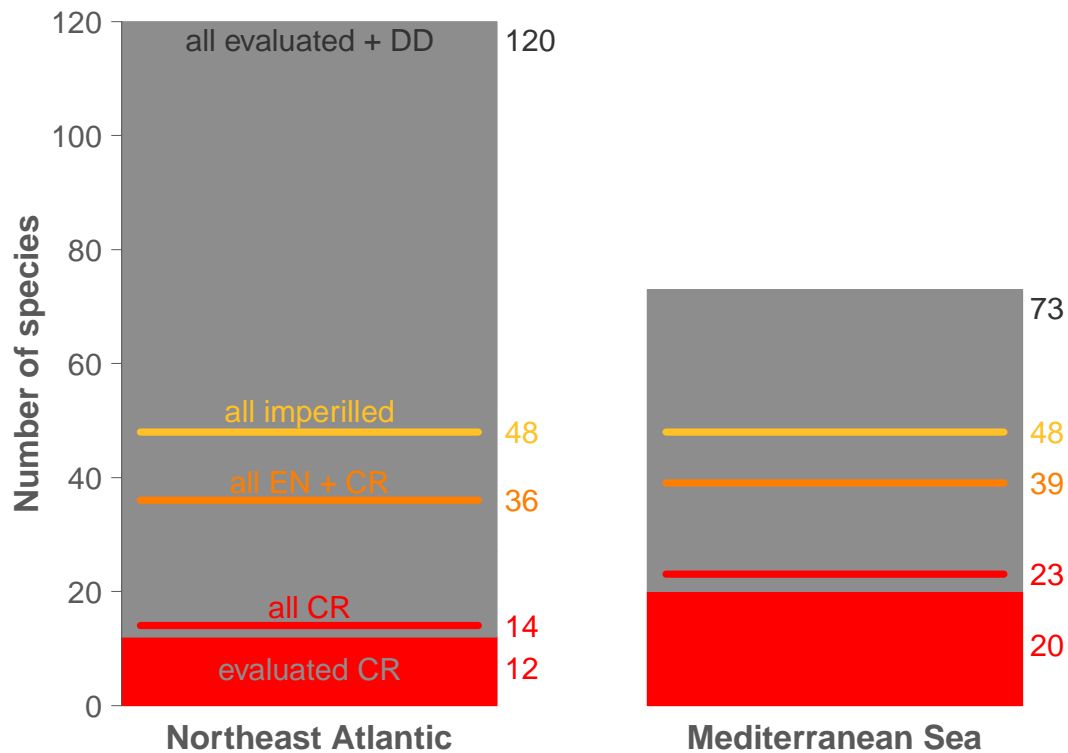

841

842 **Figure 5**

843 **Informing shark and ray conservation efforts in Europe with categorical predictions. Solid**

844 grey bars represent species of all IUCN categories excluding those officially evaluated by the

845 IUCN as Critically Endangered (CR), which are represented by solid red blocks. There are 120

846 shark and ray species in the Northeast Atlantic (left) and 73 in the Mediterranean Sea (right).

847 Horizontal red lines indicate the addition of all Data Deficient species *predicted* to be Critically

848 Endangered, to the *evaluated* block. Orange lines indicate all *evaluated* and *predicted-to-be-*

849 Endangered and Critically Endangered species, while yellow lines show all imperilled (i.e.

850 *evaluated* and *predicted-to-be-threatened*) species (Vulnerable, Endangered, and Critically

851 Endangered). Numbers beside bars indicate total number of species within each relevant

852 grouping.



Northeast Atlantic  $n=120$

Mediterranean Sea  $n=73$

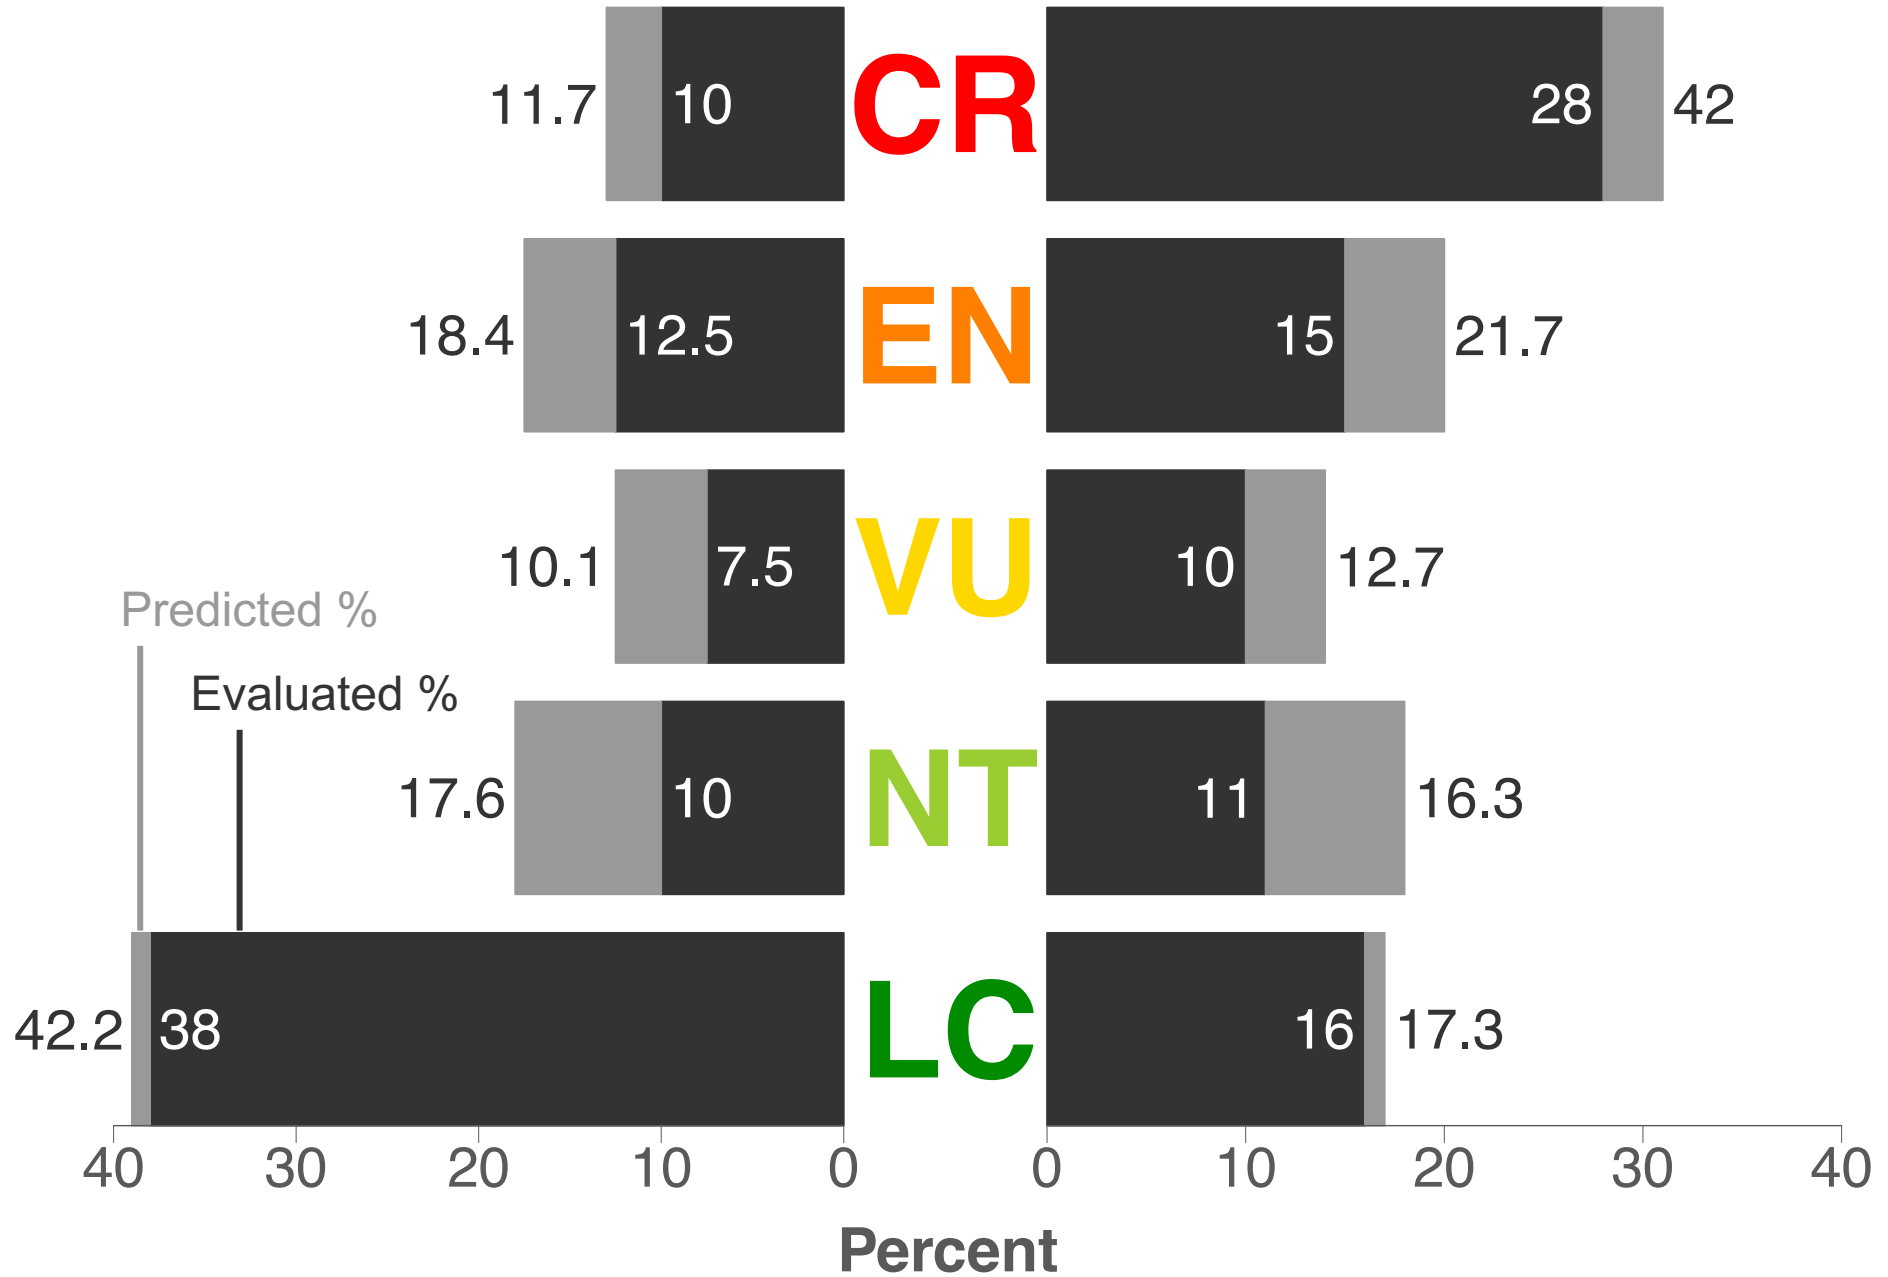

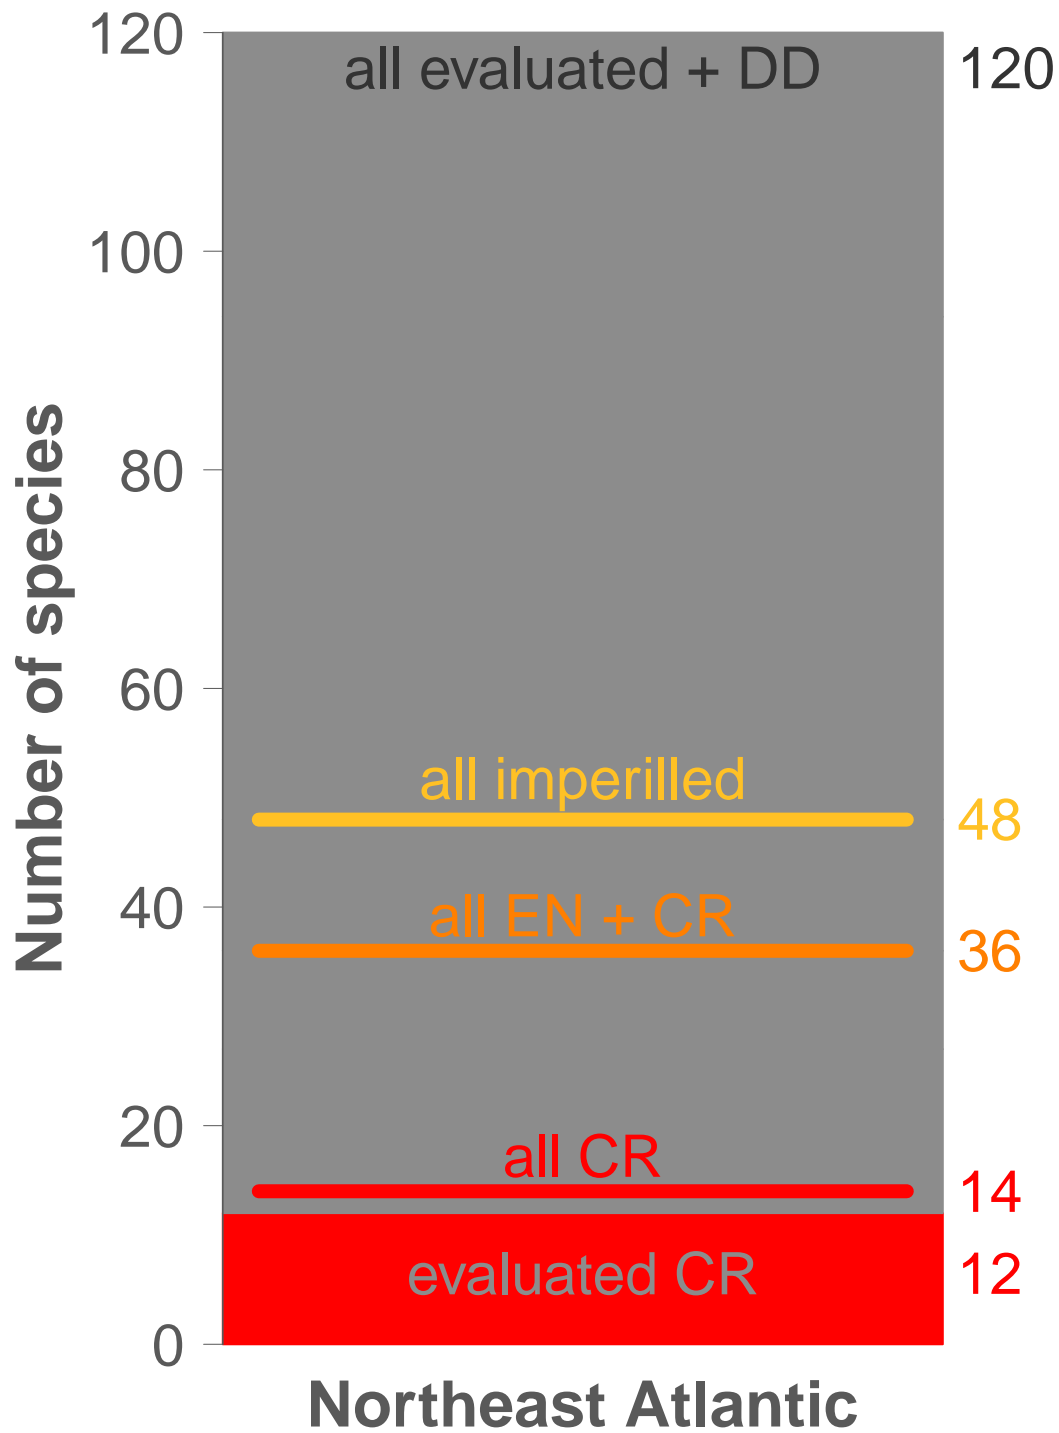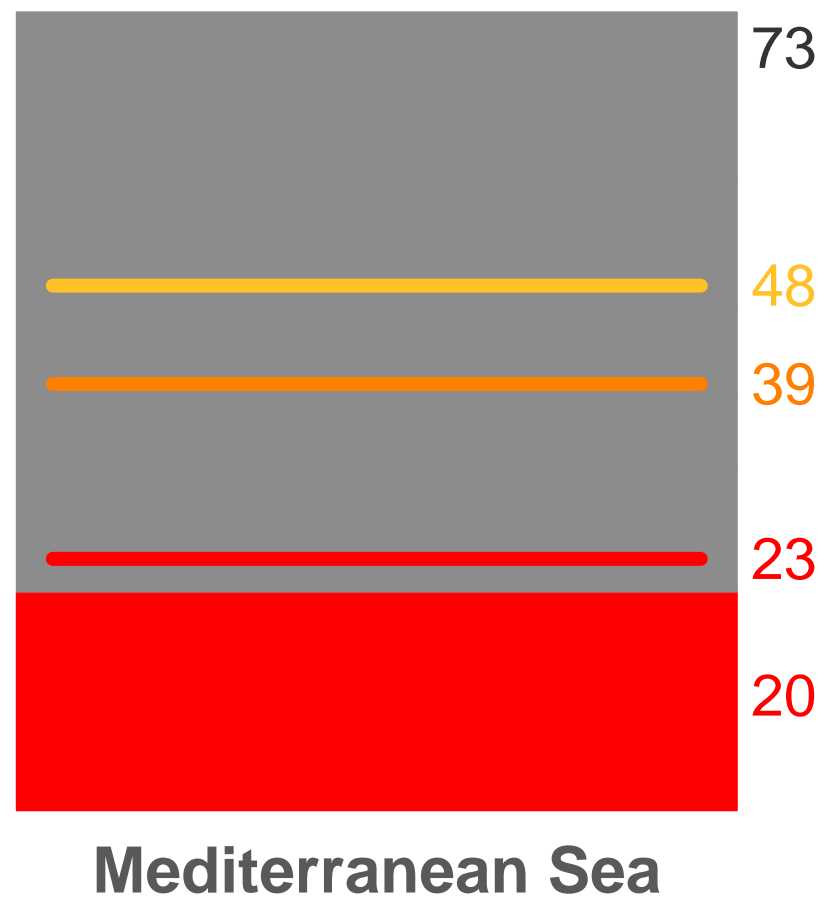

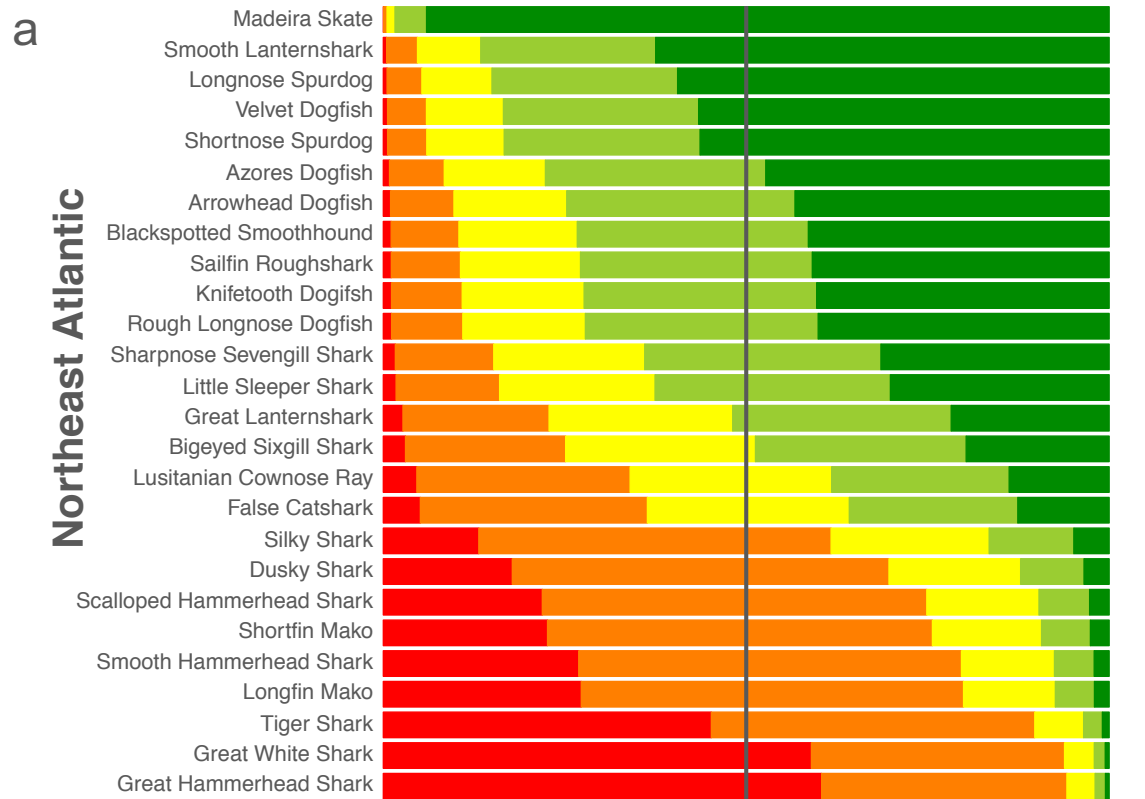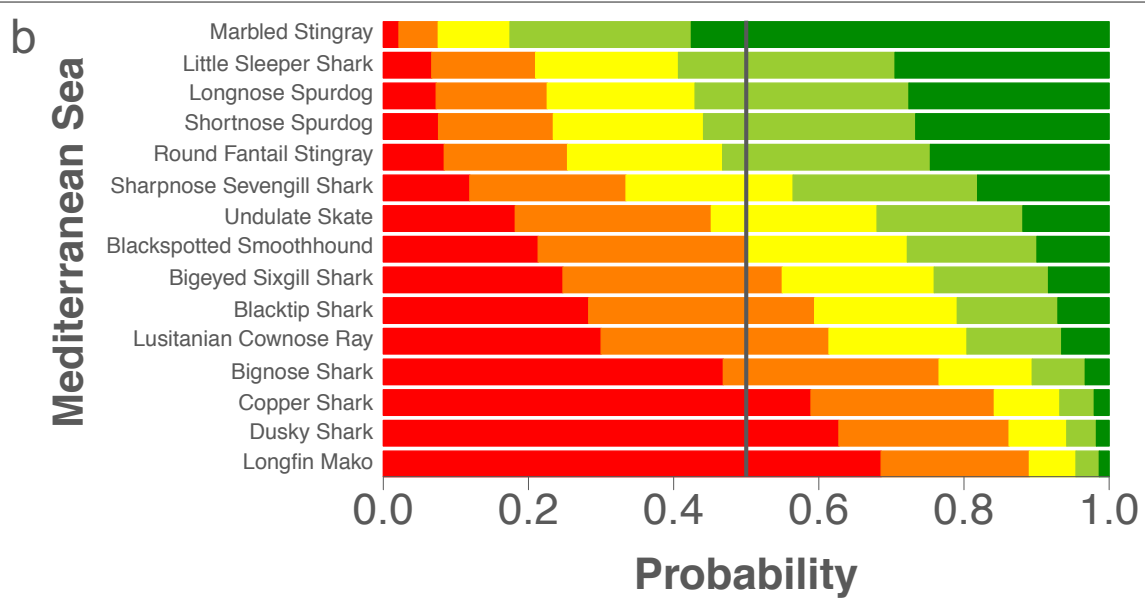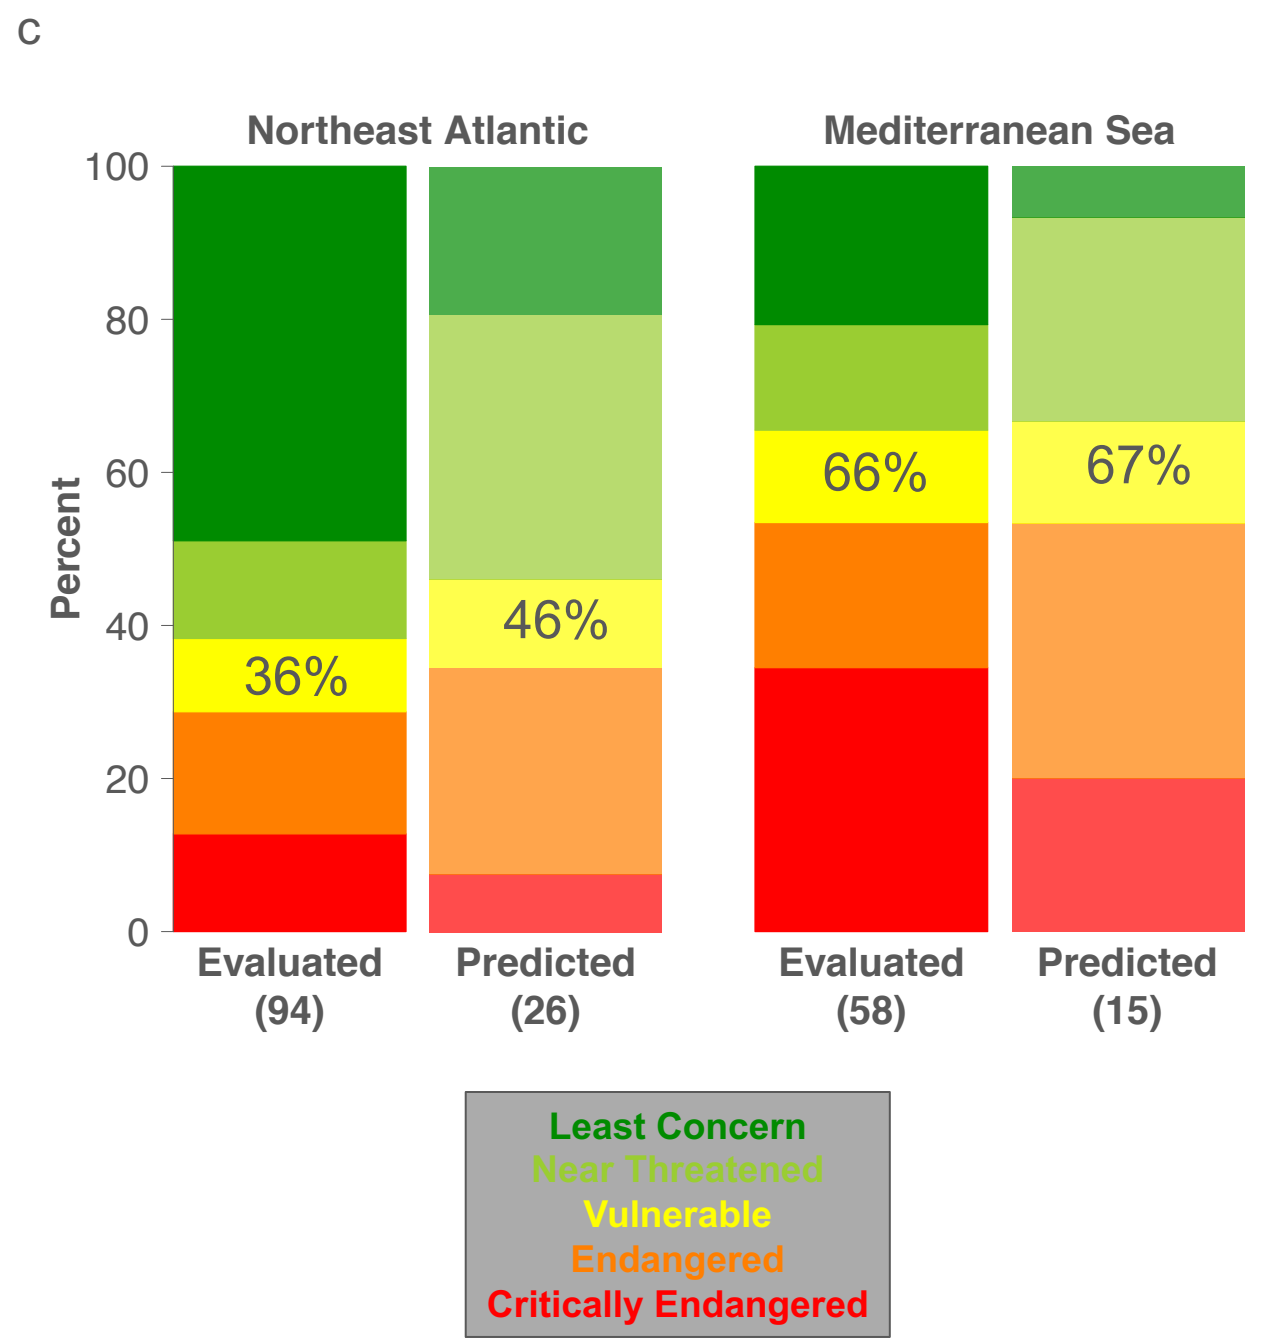

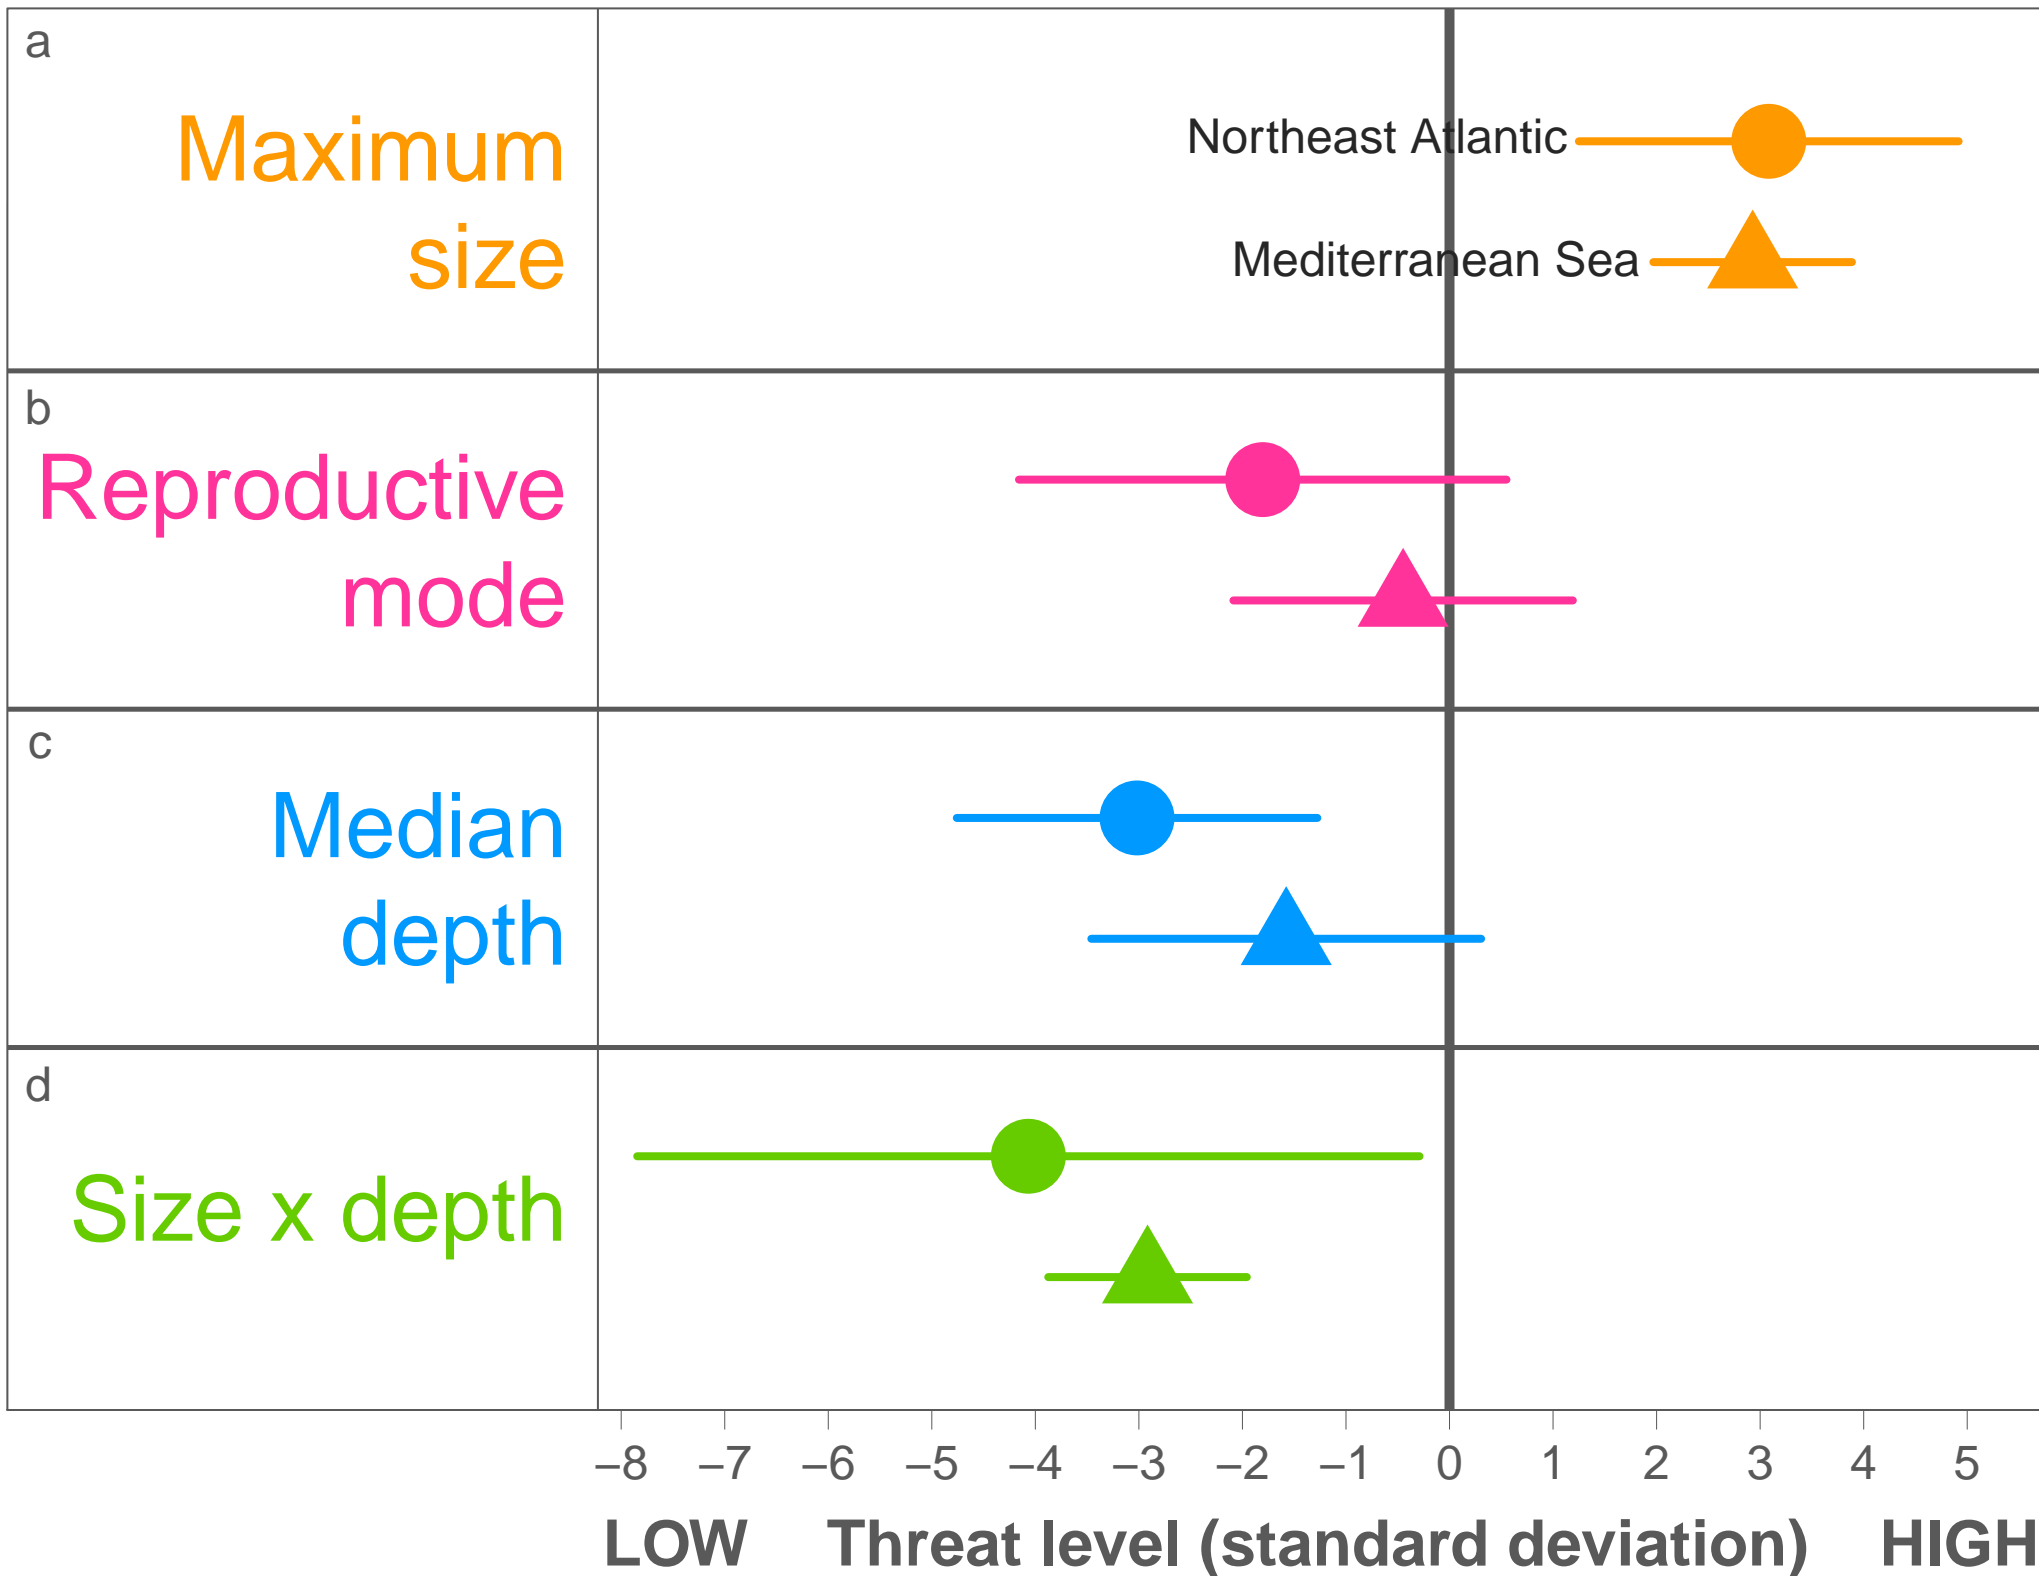

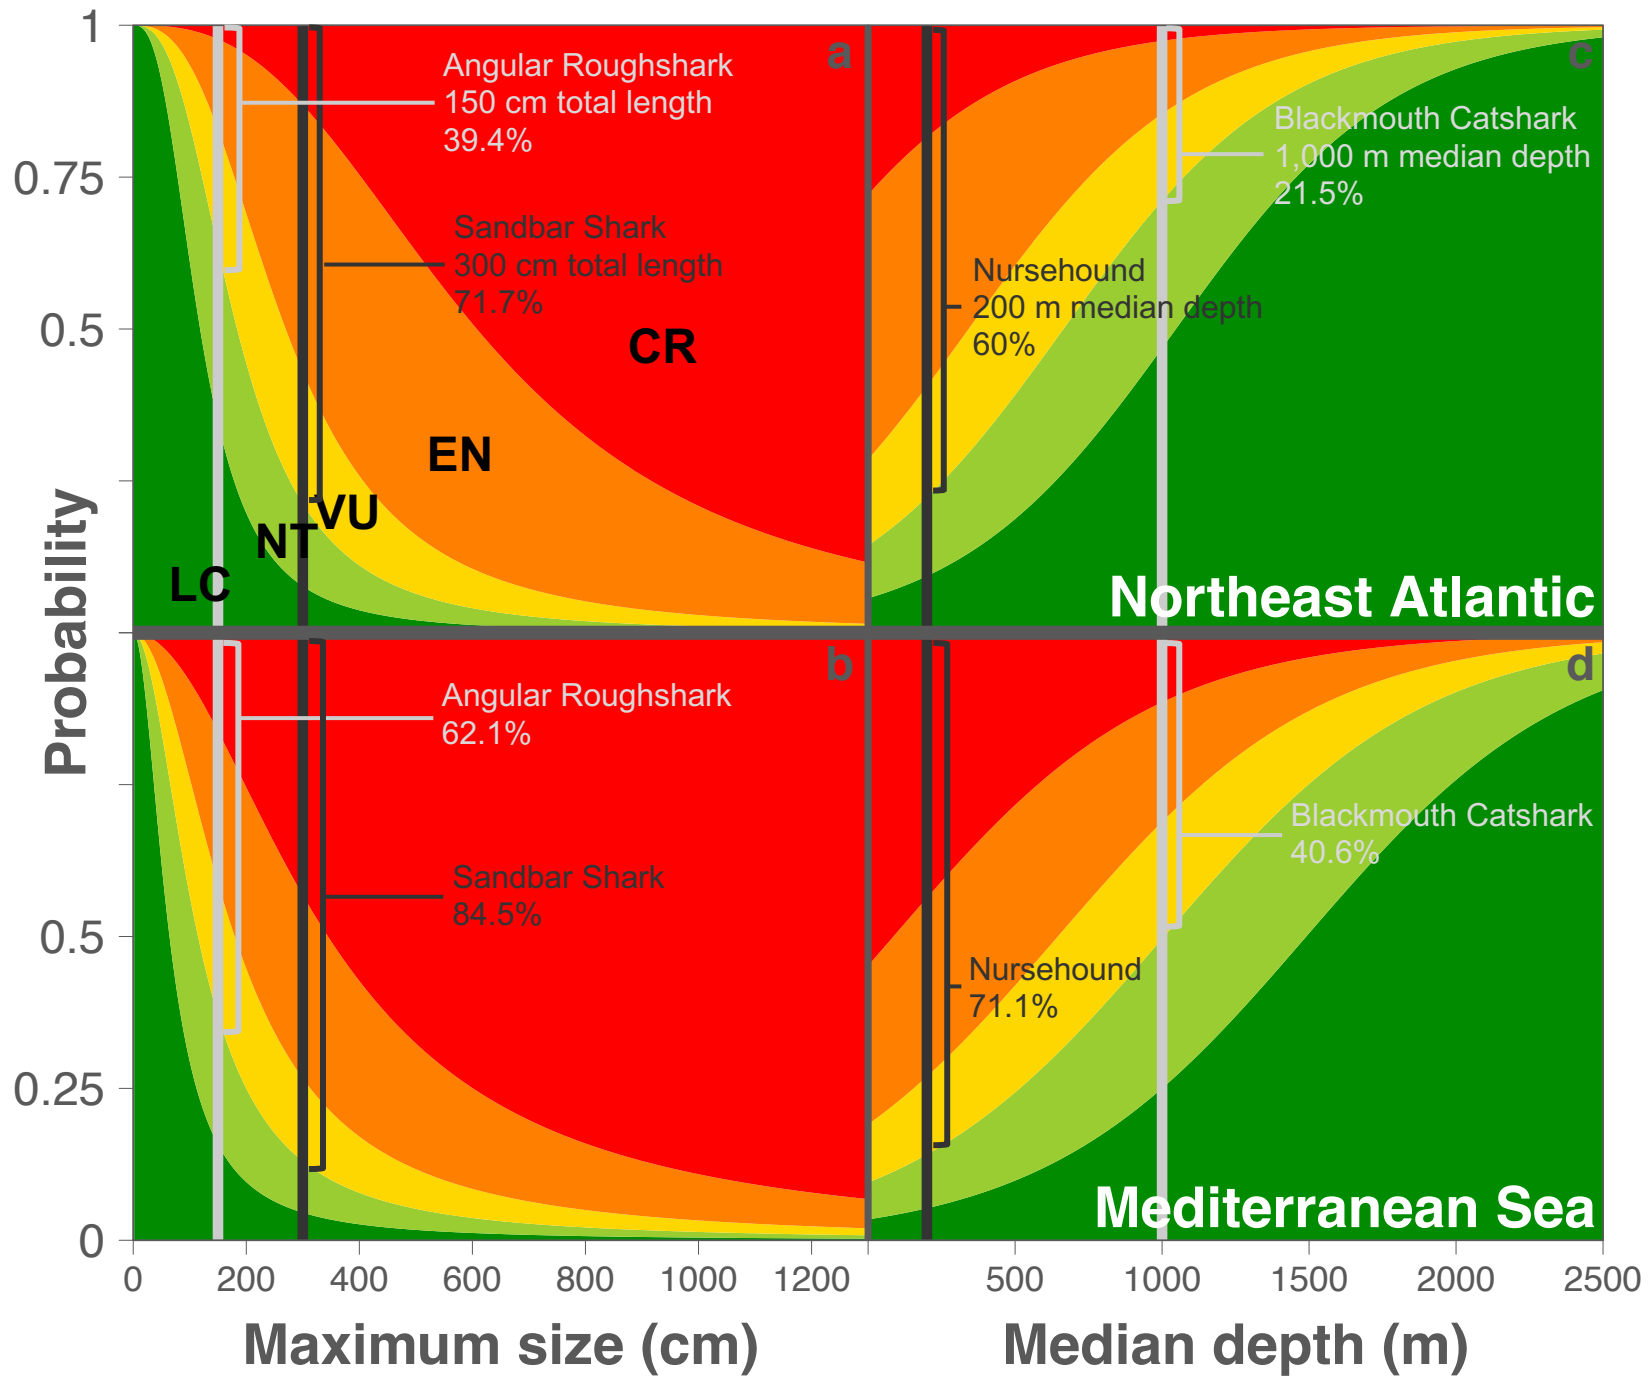

Source: https://www.biorxiv.org/content/10.1101/614776v2.full.pdf
